# Supplementary material for: Probing the protonation and reduction of heptavalent neptunium with computational guidance
Source: Royal Society of Chemistry journal article supplement (doi:10.1039/d4dt01706d), 2024-01-01
Supplement: d4dt01706d1.pdf [file d4dt01706d1.pdf]

# Probing the Protonation and Reduction of Heptavalent Neptunium with Computational Guidance

Grant C. Benthin<sup>a†</sup>, Harindu Rajapaksha<sup>a†</sup>, Emma L. Markun<sup>a</sup>, Sara E. Mason<sup>\*a,b</sup>, Tori Z. Forbes<sup>\*a</sup>

<sup>a</sup>Department of Chemistry, University of Iowa, Iowa City, IA 52242, USA

<sup>b</sup>Center for Functional Nanomaterials, Brookhaven National Laboratory, Upton, NY 11973, USA

<sup>†</sup>These authors contributed equally to this work and share first authorship

\*Corresponding Authors: Tori Z. Forbes Email: [tori-forbes@uiowa.edu](mailto:tori-forbes@uiowa.edu), Sara E. Mason Email: [smason@bnl.gov](mailto:smason@bnl.gov)

## Supporting Information

### Table of Contents

|                                                                                                       |    |
|-------------------------------------------------------------------------------------------------------|----|
| 1. Computational calculations .....                                                                   | 5  |
| 1.1 DFT optimized coordinates and optimized bond lengths .....                                        | 5  |
| <b>Table S1:</b> DFT optimized XYZ coordinates of $[NpO_4OH_2]_{aq}^{3-}$ .....                       | 5  |
| <b>Table S2:</b> DFT optimized XYZ coordinates of $[NpO_4(OH)(H_2O)]_{aq}^{2-}$ .....                 | 5  |
| <b>Table S3:</b> DFT optimized XYZ coordinates of $[NpO_4(H_2O)_2]_{aq}^{2-}$ .....                   | 5  |
| <b>Table S4:</b> DFT optimized XYZ coordinates of $[NpO_3(OH)(H_2O)_2]_{aq}$ .....                    | 6  |
| <b>Table S5:</b> DFT optimized XYZ coordinates of <i>trans</i> $[NpO_2(OH)_2(H_2O)_2]_{aq}^{+}$ ..... | 6  |
| <b>Table S6:</b> DFT optimized XYZ coordinates of <i>cis</i> $[NpO_2(OH)_2(H_2O)_2]_{aq}^{+}$ .....   | 6  |
| <b>Table S7:</b> DFT optimized XYZ coordinates of $[NpO(OH)_3(H_2O)_2]_{aq}^{2+}$ .....               | 7  |
| <b>Table S8:</b> DFT optimized XYZ coordinates of $[Np(OH)_4(H_2O)_2]_{aq}^{3+}$ .....                | 7  |
| <b>Table S9:</b> DFT optimized XYZ coordinates of $[NpO_3OH_3]_{aq}^{2-}$ .....                       | 7  |
| <b>Table S10:</b> DFT optimized XYZ coordinates of <i>cis</i> $[NpO_2OH_4]_{aq}^{2-}$ .....           | 8  |
| <b>Table S11:</b> DFT optimized XYZ coordinates of <i>trans</i> $[NpO_2OH_4]_{aq}^{2-}$ .....         | 8  |
| <b>Table S12:</b> DFT optimized XYZ coordinates of $[NpOOH_5]_{aq}$ .....                             | 8  |
| <b>Table S13:</b> DFT optimized XYZ coordinates of $[NpOH_6]_{aq}^{+}$ .....                          | 9  |
| <b>Table S14:</b> DFT optimized XYZ coordinates of $[NpO_3(OH)_2(H_2O)]_{aq}^{2-}$ .....              | 9  |
| <b>Table S15:</b> DFT optimized XYZ coordinates of <i>cis</i> $[NpO_3(OH)_3(H_2O)]_{aq}$ .....        | 9  |
| <b>Table S16:</b> DFT optimized XYZ coordinates of <i>trans</i> $[NpO_3(OH)_3(H_2O)]_{aq}$ .....      | 10 |
| <b>Table S17:</b> DFT optimized XYZ coordinates of $[NpO_2(OH)_4(H_2O)]_{aq}^{+}$ .....               | 10 |

|                                                                                                   |    |
|---------------------------------------------------------------------------------------------------|----|
| <b>Table S18:</b> DFT optimized XYZ coordinates of $[NpO_2(OH)_5(H_2O)](aq) 2 +$ .....            | 10 |
| <b>Table S19:</b> DFT optimized XYZ coordinates of $[NpO_4OH_2]aq 4 -$ .....                      | 11 |
| <b>Table S20:</b> DFT optimized XYZ coordinates of $[NpO_4(OH)(H_2O)](aq) 3 -$ .....              | 11 |
| <b>Table S21:</b> DFT optimized XYZ coordinates of $[NpO_4(H_2O)_2](aq) 2 -$ .....                | 11 |
| <b>Table S22:</b> DFT optimized XYZ coordinates of $[NpO_3(OH)(H_2O)_2](aq) -$ .....              | 12 |
| <b>Table S23:</b> DFT optimized XYZ coordinates of <i>trans</i> $[NpO_2(OH)_2(H_2O)_2](aq)$ ..... | 12 |
| <b>Table S24:</b> DFT optimized XYZ coordinates of <i>cis</i> $[NpO_2(OH)_2(H_2O)_2](aq)$ .....   | 12 |
| <b>Table S25:</b> DFT optimized XYZ coordinates of $[NpO(OH)_3(H_2O)_2](aq) +$ .....              | 13 |
| <b>Table S26:</b> DFT optimized XYZ coordinates of $[Np(OH)_4(H_2O)_2](aq) 2 +$ .....             | 13 |
| <b>Table S27:</b> DFT optimized XYZ coordinates of $[NpO_3OH_3](aq) 3 -$ .....                    | 13 |
| <b>Table S28:</b> DFT optimized XYZ coordinates of <i>cis</i> $[NpO_2OH_4](aq) 2 -$ .....         | 14 |
| <b>Table S29:</b> DFT optimized XYZ coordinates of <i>trans</i> $[NpO_2OH_4](aq) 2 -$ .....       | 14 |
| <b>Table S30:</b> DFT optimized XYZ coordinates of $[NpOOH_5](aq) -$ .....                        | 14 |
| <b>Table S31:</b> DFT optimized XYZ coordinates of $[NpOH_6](aq)$ .....                           | 15 |
| <b>Table S32:</b> DFT optimized XYZ coordinates of $[NpO_3(OH)_2(H_2O)](aq) 2 -$ .....            | 15 |
| <b>Table S33:</b> DFT optimized XYZ coordinates of <i>cis</i> $[NpO_3(OH)_3(H_2O)](aq) -$ .....   | 15 |
| <b>Table S34:</b> DFT optimized XYZ coordinates of <i>trans</i> $[NpO_3(OH)_3(H_2O)](aq) -$ ..... | 16 |
| <b>Table S35:</b> DFT optimized XYZ coordinates of $[NpO_2(OH)_4(H_2O)](aq)$ .....                | 16 |
| <b>Table S36:</b> DFT optimized XYZ coordinates of $[NpO_2(OH)_5(H_2O)](aq) +$ .....              | 16 |
| <b>Table S37:</b> DFT optimized XYZ coordinates of $H_3O(aq) +$ .....                             | 17 |
| <b>Table S38:</b> DFT optimized XYZ coordinates of $H_2O(aq)$ .....                               | 17 |
| <b>Table S39:</b> DFT optimized XYZ coordinates of $OH(aq) -$ .....                               | 17 |
| <b>Table S40:</b> DFT optimized XYZ coordinates of $O_2(aq) 2 -$ .....                            | 17 |
| <b>Table S41:</b> DFT optimized XYZ coordinates of $O_2(aq) -*$ .....                             | 17 |
| <b>Table S42:</b> DFT optimized XYZ coordinates of $HO_2(aq) -$ .....                             | 17 |
| <b>Table S43:</b> DFT optimized XYZ coordinates of $NO_3(aq) -$ .....                             | 17 |
| <b>Table S44:</b> DFT optimized XYZ coordinates of $NO_3(aq) *$ .....                             | 17 |
| <b>Table S45:</b> DFT optimized XYZ coordinates of $CO_3(aq) 2 -$ .....                           | 17 |
| <b>Table S46:</b> DFT optimized XYZ coordinates of $CO_3(aq) -*$ .....                            | 18 |
| <b>Table S47:</b> DFT optimized XYZ coordinates of $[Co(NH_3)_6](aq) 3 +$ .....                   | 18 |
| <b>Table S48:</b> DFT optimized XYZ coordinates of $[Co(NH_3)_6Cl](aq) 2 +$ .....                 | 19 |
| <b>Table S49:</b> DFT optimized XYZ coordinates of <i>cis</i> $[Co(NH_3)_6Cl_2](aq) +$ .....      | 19 |
| <b>Table S50:</b> DFT optimized XYZ coordinates of <i>trans</i> $[Co(NH_3)_6Cl_2](aq) +$ .....    | 20 |
| <b>Figure S1:</b> DFT optimized bond lengths. Here DoP stands for Degree of Protonation .....     | 21 |
| 1.2 Np(VII) Protonation reactions and their energetics. ....                                      | 22 |

|                                                                                                                                                                                                                                  |    |
|----------------------------------------------------------------------------------------------------------------------------------------------------------------------------------------------------------------------------------|----|
| <b>Table S51:</b> Protonation reactions of Np(VII) complexes .....                                                                                                                                                               | 22 |
| <b>Table S52:</b> Protonation reactions of Np(VI) complexes .....                                                                                                                                                                | 23 |
| 1.3 Influence of protonation on reduction of Np(VII) .....                                                                                                                                                                       | 24 |
| <b>Table S53:</b> Free energy changes associated with the reduction of Np(VII) to corresponding Np(VI) compounds with different reducing agents. ....                                                                            | 24 |
| <b>Table S54:</b> Spin densities and oxidation states of Np centers in Np(VI) and Np(VII) complexes. ....                                                                                                                        | 24 |
| 1.4 Prediction of Raman spectra .....                                                                                                                                                                                            | 26 |
| <b>Figure S2:</b> Predicted Raman spectra of Np(VII) and corresponding Np(VI) compounds in protonation path 1 and 2. Here DoP stands for Degree of Protonation. The color of each line corresponds to the protonation path. .... | 26 |
| <b>Figure S3:</b> Predicted Raman spectra of Np(VII) and corresponding Np(VI) compounds in protonation path 3 and 4. Here DoP stands for Degree of Protonation. The color of each line corresponds to the protonation path. .... | 26 |
| <b>Figure S4:</b> Predicted Raman spectra of Np(VII) and corresponding Np(VI) compounds in protonation path 5 and 6. Here DoP stands for Degree of Protonation. The color of each line corresponds to the protonation path. .... | 27 |
| 1.5 Benchmarking TD-DFT calculations .....                                                                                                                                                                                       | 28 |
| <b>Figure S5:</b> Simulated spectra of $[NpO_4OH_2]aq_3^-$ with TD-DFT using different functionals. ....                                                                                                                         | 28 |
| 1.6 Choice of the functional for DFT calculations.....                                                                                                                                                                           | 28 |
| 2. Experimental evidence of Np(VII) protonation .....                                                                                                                                                                            | 30 |
| 2.1 Titration studies of Np(VII) solutions .....                                                                                                                                                                                 | 30 |
| <b>Figure S6:</b> Stacked UV-Vis spectra at each pH value of the titrations. Here 410 nm and 620 nm correspond to the typical absorption bands of $[NpO_4OH_2]aq_3^-$ .....                                                      | 30 |
| <b>Figure S7:</b> Solution Raman spectra of pH 12.83 solution with fitting parameters in the spectral window of 900-650 .....                                                                                                    | 31 |
| <b>Figure S8:</b> Solution Raman spectra of pH 12.37 solution with fitting parameters in the spectral window of 900-650 cm.....                                                                                                  | 32 |
| <b>Figure S9:</b> Solution Raman spectra of pH 12.24 solution with fitting parameters in the spectral window of 900-650 cm <sup>-1</sup> .....                                                                                   | 33 |
| <b>Figure S10:</b> Solution Raman spectra of pH 12.06 solution with fitting parameters in the spectral window of 900-650 cm <sup>-1</sup> .....                                                                                  | 34 |
| <b>Figure S11:</b> Solution Raman spectra of pH 11.86 solution with fitting parameters in the spectral window of 900-650 cm <sup>-1</sup> .....                                                                                  | 35 |
| <b>Figure S12:</b> Solution Raman spectra of pH 11.65 solution with fitting parameters in the spectral window of 900-650 cm <sup>-1</sup> .....                                                                                  | 36 |
| <b>Figure S13:</b> Solution Raman spectra of pH 11.05 solution with fitting parameters in the spectral window of 900-650 cm <sup>-1</sup> .....                                                                                  | 37 |

|                                                                                                                                                                                                                                                                                                                                                                               |    |
|-------------------------------------------------------------------------------------------------------------------------------------------------------------------------------------------------------------------------------------------------------------------------------------------------------------------------------------------------------------------------------|----|
| <b>Figure S14:</b> Solution Raman spectra of pH 9.73 solution with fitting parameters in the spectral window of 900-650 $\text{cm}^{-1}$ .....                                                                                                                                                                                                                                | 38 |
| <b>Figure S15:</b> Solution Raman spectra of pH 9.18 solution with fitting parameters in the spectral window of 900-650 $\text{cm}^{-1}$ .....                                                                                                                                                                                                                                | 39 |
| <b>Figure S16:</b> Solution Raman spectra of pH 6.50 solution with fitting parameters in the spectral window of 900-650 $\text{cm}^{-1}$ .....                                                                                                                                                                                                                                | 40 |
| <b>Figure S17:</b> Optical spectroscopy of the solution formed by dissolving the precipitate from pH 6.50 solution in 1M LiOH. Here a), b), and c) are UV-Vis, Vis and NIR spectra respectively. ....                                                                                                                                                                         | 41 |
| 2.2 Protonation of Np(VII) Solids by Acid Vapor Diffusion .....                                                                                                                                                                                                                                                                                                               | 42 |
| <b>Figure S18:</b> Overlay of solid-state Raman spectra collected on a single sample of $[(\text{Co}(\text{NH}_3)_6)(\text{NpO}_4(\text{OH})_2)] \cdot (\text{H}_2\text{O})_n$ ( $n = 2-4$ ) in the spectral window 1400-400 $\text{cm}^{-1}$ . Spectra were collected periodically over the course of 21 hrs while the sample was continuously exposed to acidic vapor. .... | 42 |
| <b>Figure S19:</b> Solid-state Raman spectra with fitting parameters and statistics of neat $[(\text{Co}(\text{NH}_3)_6)(\text{NpO}_4(\text{OH})_2)] \cdot (\text{H}_2\text{O})_n$ ( $n = 2-4$ ). ....                                                                                                                                                                        | 43 |
| <b>Figure S20:</b> Solid-state Raman spectra with fitting parameters and statistics of $[(\text{Co}(\text{NH}_3)_6)(\text{NpO}_4(\text{OH})_2)] \cdot (\text{H}_2\text{O})_n$ ( $n = 2-4$ ) after 1 hour of exposure to acidic vapor.....                                                                                                                                     | 43 |
| <b>Figure S21:</b> Solid-state Raman spectra with fitting parameters and statistics of $[(\text{Co}(\text{NH}_3)_6)(\text{NpO}_4(\text{OH})_2)] \cdot (\text{H}_2\text{O})_n$ ( $n = 2-4$ ) after 1.35 hour of exposure to acidic vapor.....                                                                                                                                  | 44 |
| <b>Figure S22:</b> Solid-state Raman spectra with fitting parameters and statistics of $[(\text{Co}(\text{NH}_3)_6)(\text{NpO}_4(\text{OH})_2)] \cdot (\text{H}_2\text{O})_n$ ( $n = 2-4$ ) after 1.6 hour of exposure to acidic vapor.....                                                                                                                                   | 45 |
| <b>Figure S23:</b> Solid-state Raman spectra with fitting parameters and statistics of $[(\text{Co}(\text{NH}_3)_6)(\text{NpO}_4(\text{OH})_2)] \cdot (\text{H}_2\text{O})_n$ ( $n = 2-4$ ) after 2.0 hour of exposure to acidic vapor.....                                                                                                                                   | 46 |
| <b>Figure S24:</b> Solid-state Raman spectra with fitting parameters and statistics of $[(\text{Co}(\text{NH}_3)_6)(\text{NpO}_4(\text{OH})_2)] \cdot (\text{H}_2\text{O})_n$ ( $n = 2-4$ ) after 4 hours of exposure to acidic vapor.....                                                                                                                                    | 47 |
| <b>Figure S25:</b> Solid-state Raman spectra with fitting parameters and statistics of $[(\text{Co}(\text{NH}_3)_6)(\text{NpO}_4(\text{OH})_2)] \cdot (\text{H}_2\text{O})_n$ ( $n = 2-4$ ) after 8 hours of exposure to acidic vapor.....                                                                                                                                    | 48 |
| <b>Figure S26:</b> Solid-state Raman spectra with fitting parameters and statistics of $[(\text{Co}(\text{NH}_3)_6)(\text{NpO}_4(\text{OH})_2)] \cdot (\text{H}_2\text{O})_n$ ( $n = 2-4$ ) after 16 hours of exposure to acidic vapor.....                                                                                                                                   | 48 |
| <b>Figure S27:</b> Solid-state Raman spectra with fitting parameters and statistics of $[(\text{Co}(\text{NH}_3)_6)(\text{NpO}_4(\text{OH})_2)] \cdot (\text{H}_2\text{O})_n$ ( $n = 2-4$ ) after 21 hours of exposure to acidic vapor.....                                                                                                                                   | 49 |
| 3. References .....                                                                                                                                                                                                                                                                                                                                                           | 49 |

## 1. Computational calculations

### 1.1 DFT optimized coordinates and optimized bond lengths

**Table S1:** DFT optimized XYZ coordinates of  $[NpO_4(OH)_2]_{(aq)}^{3-}$

|    |          |          |          |
|----|----------|----------|----------|
| Np | -5.54480 | -0.88550 | 0.00070  |
| O  | -5.53080 | 1.01120  | 0.04600  |
| O  | -3.65210 | -0.90000 | -0.10570 |
| O  | -7.44140 | -0.87330 | -0.05610 |
| O  | -5.55720 | -2.77750 | 0.11800  |
| O  | -5.50380 | -0.83880 | 2.40210  |
| H  | -5.47450 | 0.09180  | 2.64480  |
| O  | -5.57580 | -0.94240 | -2.40030 |
| H  | -6.50500 | -0.95730 | -2.64950 |

**Table S2:** DFT optimized XYZ coordinates of  $[NpO_4(OH)(H_2O)]_{(aq)}^{2-}$

|    |          |          |          |
|----|----------|----------|----------|
| Np | -5.58390 | -0.91400 | -0.12010 |
| O  | -5.59090 | 0.96260  | 0.01700  |
| O  | -3.71020 | -0.90790 | -0.12420 |
| O  | -7.45720 | -0.92010 | -0.13230 |
| O  | -5.57730 | -2.78870 | 0.02820  |
| O  | -5.57750 | -0.82620 | 2.55270  |
| H  | -5.26900 | 0.04990  | 2.81440  |
| O  | -5.56810 | -0.92150 | -2.46450 |
| H  | -6.47390 | -0.92820 | -2.78850 |
| H  | -4.96430 | -1.45050 | 2.95900  |

**Table S3:** DFT optimized XYZ coordinates of  $[NpO_4(H_2O)_2]_{(aq)}^-$

|    |          |          |          |
|----|----------|----------|----------|
| Np | -5.61390 | -0.86640 | 0.00870  |
| O  | -5.55340 | 0.98750  | -0.01580 |
| O  | -3.76290 | -0.92750 | -0.10480 |
| O  | -7.46820 | -0.80990 | 0.01090  |
| O  | -5.66770 | -2.71620 | 0.14570  |
| O  | -5.53370 | -0.75760 | 2.60640  |
| H  | -5.06010 | 0.00240  | 2.96590  |
| O  | -5.70910 | -0.97810 | -2.58880 |
| H  | -6.48200 | -1.43180 | -2.94650 |
| H  | -5.14760 | -1.53390 | 3.03010  |
| H  | -4.94340 | -1.39310 | -3.00430 |

**Table S4:** DFT optimized XYZ coordinates of  $[NpO_3(OH)(H_2O)_2]_{(aq)}$ 

|    |          |          |          |
|----|----------|----------|----------|
| Np | -5.67260 | -0.86760 | 0.01980  |
| O  | -5.52820 | 0.90510  | -0.14530 |
| O  | -3.56570 | -0.88720 | -0.13810 |
| O  | -7.50370 | -0.81160 | 0.14880  |
| O  | -5.59560 | -2.64760 | 0.17530  |
| O  | -5.45350 | -0.67300 | 2.52470  |
| H  | -5.10530 | 0.13760  | 2.91660  |
| O  | -5.83230 | -1.11310 | -2.48670 |
| H  | -5.48150 | -1.90450 | -2.91390 |
| H  | -5.07760 | -1.40570 | 3.02840  |
| H  | -5.60540 | -0.36900 | -3.05820 |
| H  | -3.20940 | -1.78430 | -0.08560 |

**Table S5:** DFT optimized XYZ coordinates of  $^{trans}[NpO_2(OH)_2(H_2O)_2]_{(aq)}^+$ 

|    |          |          |          |
|----|----------|----------|----------|
| Np | -5.37350 | -0.88880 | -0.04330 |
| O  | -5.58000 | 0.84000  | -0.07830 |
| O  | -3.31890 | -0.68060 | 0.02720  |
| O  | -7.41930 | -1.11040 | 0.05160  |
| O  | -5.19120 | -2.61440 | 0.10430  |
| O  | -5.34650 | -0.71170 | 2.37770  |
| H  | -5.73580 | 0.03320  | 2.85460  |
| O  | -6.02640 | -0.97470 | -2.46430 |
| H  | -6.79860 | -1.50710 | -2.69760 |
| H  | -5.34620 | -1.47190 | 2.97440  |
| H  | -5.35860 | -1.13310 | -3.14580 |
| H  | -2.77630 | -1.48360 | 0.06970  |
| H  | -7.97960 | -0.31870 | 0.03020  |

**Table S6:** DFT optimized XYZ coordinates of  $^{cis}[NpO_2(OH)_2(H_2O)_2]_{(aq)}^+$ 

|    |          |          |          |
|----|----------|----------|----------|
| Np | -5.45620 | -0.76140 | 0.05130  |
| O  | -5.66690 | 1.21900  | -0.31940 |
| O  | -3.49280 | -0.45570 | -0.32610 |
| O  | -7.21950 | -0.68660 | 0.18180  |
| O  | -5.05230 | -2.47650 | 0.21300  |
| O  | -5.73170 | -1.06590 | 2.54730  |
| H  | -6.17600 | -0.38200 | 3.06570  |
| O  | -5.74440 | -1.17110 | -2.32370 |
| H  | -6.48490 | -0.84780 | -2.85260 |
| H  | -4.98870 | -1.38180 | 3.07840  |
| H  | -5.32440 | -1.89150 | -2.81060 |
| H  | -2.85910 | -1.18640 | -0.25280 |
| H  | -4.80890 | 1.65230  | -0.47700 |

**Table S7:** DFT optimized XYZ coordinates of  $[NpO(OH)_3(H_2O)_2]_{(aq)}^{2+}$ 

|    |          |          |          |
|----|----------|----------|----------|
| Np | -5.34860 | -0.99270 | 0.10740  |
| O  | -5.64970 | 0.96560  | -0.05350 |
| O  | -3.54820 | -0.63880 | -0.49910 |
| O  | -7.04020 | -1.28360 | 0.35410  |
| O  | -5.07170 | -2.95530 | -0.08400 |
| O  | -5.68040 | -0.46660 | 2.49810  |
| H  | -4.94440 | -0.24790 | 3.08680  |
| O  | -5.83950 | -1.04240 | -2.21560 |
| H  | -6.54210 | -1.58670 | -2.59970 |
| H  | -6.36850 | -0.89470 | 3.02580  |
| H  | -5.16230 | -0.90660 | -2.89440 |
| H  | -2.78310 | -1.24880 | -0.44020 |
| H  | -4.93290 | 1.59530  | -0.26380 |
| H  | -5.71630 | -3.64940 | 0.15120  |

**Table S8:** DFT optimized XYZ coordinates of  $[Np(OH)_4(H_2O)_2]_{(aq)}^{3+}$ 

|    |          |          |          |
|----|----------|----------|----------|
| Np | -5.73310 | -1.17770 | 0.18180  |
| O  | -5.99580 | 0.72990  | 0.15300  |
| O  | -3.83640 | -0.90480 | -0.00720 |
| O  | -7.60400 | -1.33900 | -0.28570 |
| O  | -5.44580 | -3.03200 | -0.26890 |
| O  | -5.20720 | -0.40460 | 2.41150  |
| H  | -5.29680 | 0.50910  | 2.72390  |
| O  | -5.62680 | -0.92090 | -2.13720 |
| H  | -6.35140 | -1.18480 | -2.72690 |
| H  | -4.55160 | -0.85580 | 2.96780  |
| H  | -4.80190 | -0.89750 | -2.64870 |
| H  | -3.05020 | -1.49330 | 0.07240  |
| H  | -5.35910 | 1.46810  | 0.00370  |
| H  | -5.98920 | -3.83180 | -0.07510 |
| H  | -8.38860 | -0.78760 | -0.05910 |

**Table S9:** DFT optimized XYZ coordinates of  $[NpO_3(OH)_3]_{(aq)}^{2-}$ 

|    |          |          |          |
|----|----------|----------|----------|
| Np | -5.56930 | -0.80760 | -0.01860 |
| O  | -5.60970 | 1.01360  | 0.04970  |
| O  | -3.67730 | -0.88670 | -0.17010 |
| O  | -7.77750 | -0.74620 | 0.15020  |
| O  | -5.75330 | -2.61860 | -0.06900 |
| O  | -5.43510 | -0.90660 | 2.26020  |
| H  | -5.24630 | -0.04430 | 2.64410  |
| O  | -5.77950 | -0.69730 | -2.28960 |
| H  | -5.71320 | -1.56770 | -2.69540 |
| H  | -8.05100 | 0.17660  | 0.20150  |

**Table S10:** DFT optimized XYZ coordinates of  $cis[NpO_2(OH)_4]_{(aq)}^-$ 

|    |          |          |          |
|----|----------|----------|----------|
| Np | -5.45420 | -0.81760 | -0.01990 |
| O  | -5.66200 | 0.98350  | -0.17620 |
| O  | -3.67940 | -1.19510 | -0.14200 |
| O  | -7.54920 | -0.88650 | 0.17070  |
| O  | -5.59610 | -2.91710 | 0.19610  |
| O  | -5.18840 | -0.55590 | 2.13700  |
| H  | -5.69600 | 0.18040  | 2.49850  |
| O  | -5.56870 | -0.97220 | -2.19970 |
| H  | -6.14430 | -0.30980 | -2.60030 |
| H  | -8.01840 | -0.04460 | 0.13050  |
| H  | -6.53540 | -3.13280 | 0.30170  |

**Table S11:** DFT optimized XYZ coordinates of  $trans[NpO_2(OH)_4]_{(aq)}^-$ 

|    |          |          |          |
|----|----------|----------|----------|
| Np | -5.63020 | -0.95350 | 0.04150  |
| O  | -5.63080 | 0.81150  | -0.15270 |
| O  | -3.46170 | -0.97980 | -0.09260 |
| O  | -7.79830 | -0.90930 | 0.17460  |
| O  | -5.62550 | -2.71910 | 0.23580  |
| O  | -5.49070 | -0.74660 | 2.20190  |
| H  | -5.54640 | 0.16140  | 2.52280  |
| O  | -5.76320 | -1.22650 | -2.11220 |
| H  | -5.88280 | -0.41060 | -2.61280 |
| H  | -8.19800 | -0.03430 | 0.11020  |
| H  | -3.05230 | -1.85060 | -0.03210 |

**Table S12:** DFT optimized XYZ coordinates of  $[NpO(OH)_5]_{(aq)}$ 

|    |          |          |          |
|----|----------|----------|----------|
| Np | -5.50610 | -0.81430 | 0.06160  |
| O  | -5.56640 | 0.96190  | 0.05650  |
| O  | -3.41070 | -0.77160 | 0.06710  |
| O  | -7.58710 | -0.82680 | -0.04630 |
| O  | -5.44550 | -2.81900 | 0.20530  |
| O  | -5.51550 | -0.73260 | 2.14780  |
| H  | -5.62860 | 0.10470  | 2.61740  |
| O  | -5.44830 | -1.03710 | -2.01500 |
| H  | -6.19150 | -0.73470 | -2.55630 |
| H  | -8.09130 | -0.01510 | 0.10230  |
| H  | -2.94550 | -1.60280 | -0.10550 |
| H  | -5.48430 | -3.33300 | -0.61800 |



**Table S13:** DFT optimized XYZ coordinates of  $[Np(OH)_6]_{(aq)}^+$ 

|    |          |          |          |
|----|----------|----------|----------|
| Np | -5.46440 | -0.86990 | -0.04740 |
| O  | -5.47310 | 1.13800  | 0.01790  |
| O  | -3.44970 | -0.87560 | -0.14620 |
| O  | -7.47390 | -0.84960 | -0.11720 |
| O  | -5.49130 | -2.88470 | 0.06550  |
| O  | -5.34750 | -0.89660 | 1.96500  |
| H  | -5.49840 | -0.09610 | 2.49800  |
| O  | -5.41030 | -0.89690 | -2.06250 |
| H  | -6.20410 | -1.07960 | -2.59590 |
| H  | -8.02540 | -0.14770 | 0.27100  |
| H  | -2.88970 | -1.16610 | 0.59450  |
| H  | -6.00060 | -3.45910 | -0.53290 |
| H  | -4.81760 | 1.73850  | -0.37620 |

**Table S14:** DFT optimized XYZ coordinates of  $[NpO_3(OH)_2(H_2O)]_{(aq)}^-$ 

|    |          |          |          |
|----|----------|----------|----------|
| Np | -5.56120 | -0.89710 | -0.15960 |
| O  | -5.81350 | 0.88090  | -0.34720 |
| O  | -3.70150 | -0.75140 | -0.27660 |
| O  | -7.69100 | -1.06100 | 0.19630  |
| O  | -5.52120 | -2.68020 | 0.10970  |
| O  | -5.32070 | -0.55750 | 2.40520  |
| H  | -4.79330 | 0.20080  | 2.68590  |
| O  | -5.83300 | -1.22960 | -2.35460 |
| H  | -5.85320 | -0.42670 | -2.88500 |
| H  | -8.11280 | -0.19990 | 0.08670  |
| H  | -4.97720 | -1.31400 | 2.89680  |

**Table S15:** DFT optimized XYZ coordinates of  $^{cis}[NpO_3(OH)_3(H_2O)]_{(aq)}$ 

|    |          |          |          |
|----|----------|----------|----------|
| Np | -5.52410 | -0.87970 | -0.08990 |
| O  | -5.57930 | 0.91280  | -0.19290 |
| O  | -3.75560 | -1.20710 | -0.11390 |
| O  | -7.56450 | -0.83890 | 0.15000  |
| O  | -5.66500 | -2.92660 | 0.09550  |
| O  | -5.29500 | -0.69200 | 2.40990  |
| H  | -5.68710 | 0.05780  | 2.87580  |
| O  | -5.66460 | -1.01470 | -2.23020 |
| H  | -6.07940 | -0.29260 | -2.71640 |
| H  | -8.05070 | -0.02580 | -0.04610 |
| H  | -6.59440 | -3.19890 | 0.17410  |
| H  | -4.43440 | -0.85180 | 2.81810  |

**Table S16:** DFT optimized XYZ coordinates of  $trans[NpO_3(OH)_3(H_2O)]_{(aq)}$ 

|    |          |          |          |
|----|----------|----------|----------|
| Np | -5.65610 | -0.95090 | -0.05100 |
| O  | -5.65720 | 0.79980  | -0.20560 |
| O  | -3.54160 | -0.98220 | -0.04990 |
| O  | -7.76190 | -0.90420 | 0.13110  |
| O  | -5.64510 | -2.68800 | 0.22790  |
| O  | -5.53870 | -0.67690 | 2.43660  |
| H  | -5.22210 | 0.15180  | 2.81900  |
| O  | -5.73520 | -1.18970 | -2.16880 |
| H  | -5.98550 | -0.46940 | -2.75910 |
| H  | -8.21450 | -0.07430 | -0.07020 |
| H  | -3.10180 | -1.84240 | -0.02500 |
| H  | -5.18770 | -1.38970 | 2.98590  |

**Table S17:** DFT optimized XYZ coordinates of  $[NpO_2(OH)_4(H_2O)]_{(aq)}^+$ 

|    |          |          |          |
|----|----------|----------|----------|
| Np | -5.61710 | -1.01000 | -0.04580 |
| O  | -5.52510 | 0.73580  | -0.16600 |
| O  | -3.60060 | -1.26830 | -0.09500 |
| O  | -7.63820 | -0.90440 | 0.17650  |
| O  | -5.80010 | -2.95080 | 0.26050  |
| O  | -5.45400 | -0.61590 | 2.35800  |
| H  | -5.07620 | 0.20170  | 2.71020  |
| O  | -5.73530 | -1.07620 | -2.09740 |
| H  | -5.84650 | -0.37540 | -2.75440 |
| H  | -8.15760 | -0.12870 | -0.09240 |
| H  | -2.96870 | -0.70300 | -0.56860 |
| H  | -5.02460 | -3.53670 | 0.17530  |
| H  | -5.26200 | -1.32200 | 2.99060  |

**Table S18:** DFT optimized XYZ coordinates of  $[NpO_2(OH)_5(H_2O)]_{(aq)}^{2+}$ 

|    |          |          |          |
|----|----------|----------|----------|
| Np | -5.37980 | -0.91620 | -0.04990 |
| O  | -5.25720 | 1.04340  | -0.04570 |
| O  | -3.49710 | -1.16690 | -0.60950 |
| O  | -7.31870 | -0.74150 | 0.20980  |
| O  | -5.74610 | -2.85370 | -0.01270 |
| O  | -5.61820 | -0.92060 | 2.35470  |
| H  | -6.33790 | -0.45450 | 2.80540  |
| O  | -5.71620 | -0.85310 | -2.02570 |
| H  | -6.50570 | -0.89350 | -2.59320 |
| H  | -7.78770 | 0.11820  | 0.23780  |
| H  | -2.78780 | -1.31560 | 0.05240  |
| H  | -5.08220 | -3.55370 | -0.17870 |
| H  | -4.72800 | 1.64480  | -0.60680 |
| H  | -4.82480 | -0.85680 | 2.90990  |

**Table S19:** DFT optimized XYZ coordinates of  $[NpO_4(OH)_2]_{(aq)}^{4-}$ 

|    |          |          |          |
|----|----------|----------|----------|
| Np | -5.64285 | -0.75438 | -0.00445 |
| O  | -5.71984 | 1.21617  | -0.15277 |
| O  | -3.67926 | -0.66146 | 0.10958  |
| O  | -7.60528 | -0.84664 | -0.11876 |
| O  | -5.56703 | -2.72497 | 0.14315  |
| O  | -5.77880 | -0.56630 | 2.47521  |
| H  | -4.85273 | -0.58263 | 2.73577  |
| O  | -5.51778 | -0.95125 | -2.48564 |
| H  | -6.42189 | -1.20021 | -2.70208 |

**Table S20:** DFT optimized XYZ coordinates of  $[NpO_4(OH)(H_2O)]_{(aq)}^{3-}$ 

|    |          |          |          |
|----|----------|----------|----------|
| Np | -6.09583 | -1.70040 | -0.06916 |
| O  | -6.69611 | -0.22262 | 1.10422  |
| O  | -4.41874 | -1.76940 | 0.95175  |
| O  | -7.80930 | -1.69789 | -0.96036 |
| O  | -5.60279 | -3.32128 | -1.01679 |
| O  | -4.54852 | 0.40446  | 2.55130  |
| H  | -5.44946 | 0.37403  | 2.12153  |
| O  | -5.13328 | -0.24579 | -1.66879 |
| H  | -5.79059 | -0.06271 | -2.34691 |
| H  | -4.22758 | -0.40301 | 2.07487  |

**Table S21:** DFT optimized XYZ coordinates of  $[NpO_4(H_2O)_2]_{(aq)}^{2-}$ 

|    |          |          |          |
|----|----------|----------|----------|
| Np | -4.77968 | -1.71471 | 0.00211  |
| O  | -4.67059 | 0.22993  | 0.26359  |
| O  | -2.88636 | -1.83808 | 0.20160  |
| O  | -6.72586 | -1.56462 | -0.24329 |
| O  | -4.90353 | -3.60447 | -0.22406 |
| O  | -5.50378 | -0.83879 | 2.40203  |
| H  | -5.22241 | -0.11921 | 1.74987  |
| O  | -5.57582 | -0.94237 | -2.40019 |
| H  | -6.32347 | -1.11761 | -1.73952 |
| H  | -4.83779 | -0.84439 | 3.09945  |
| H  | -5.64796 | -1.62299 | -3.07931 |

**Table S22:** DFT optimized XYZ coordinates of  $[NpO_3(OH)(H_2O)_2]_{(aq)}^-$ 

|    |          |          |          |
|----|----------|----------|----------|
| Np | -6.00580 | -0.85739 | 0.06063  |
| O  | -5.96241 | 0.96857  | -0.02817 |
| O  | -3.79319 | -0.79493 | -0.55130 |
| O  | -7.88997 | -0.90398 | 0.36287  |
| O  | -5.82596 | -2.67736 | 0.15908  |
| O  | -5.32235 | -0.70572 | 2.52776  |
| H  | -4.91392 | 0.11793  | 2.82112  |
| O  | -5.50485 | -0.87108 | -2.60085 |
| H  | -5.59706 | -1.73587 | -3.01773 |
| H  | -4.78533 | -1.41975 | 2.89234  |
| H  | -4.61308 | -0.86281 | -2.17288 |
| H  | -3.41686 | -1.67853 | -0.46694 |

**Table S23:** DFT optimized XYZ coordinates of  $^{trans}[NpO_2(OH)_2(H_2O)_2]_{(aq)}$ 

|    |          |          |          |
|----|----------|----------|----------|
| Np | -5.37283 | -0.81957 | 0.06034  |
| O  | -5.60890 | 0.93906  | 0.01483  |
| O  | -3.22699 | -0.54086 | 0.15664  |
| O  | -7.52020 | -1.11154 | -0.01772 |
| O  | -5.14868 | -2.57728 | 0.15055  |
| O  | -5.55488 | -0.79779 | 2.55085  |
| H  | -5.45441 | 0.00410  | 3.07816  |
| O  | -5.96295 | -0.97682 | -2.45097 |
| H  | -6.86151 | -1.33389 | -2.45182 |
| H  | -5.23232 | -1.53277 | 3.08667  |
| H  | -5.44239 | -1.53400 | -3.04347 |
| H  | -2.71301 | -1.35531 | 0.21371  |
| H  | -8.04506 | -0.30239 | -0.04185 |

**Table S24:** DFT optimized XYZ coordinates of  $^{cis}[NpO_2(OH)_2(H_2O)_2]_{(aq)}$ 

|    |          |          |          |
|----|----------|----------|----------|
| Np | -5.63974 | -0.90506 | 0.00179  |
| O  | -5.85367 | 1.18750  | -0.06899 |
| O  | -3.56933 | -0.59203 | -0.12607 |
| O  | -7.46371 | -0.96422 | 0.01624  |
| O  | -5.32105 | -2.69877 | 0.12073  |
| O  | -5.51268 | -0.78477 | 2.51913  |
| H  | -5.48439 | 0.07044  | 2.96618  |
| O  | -5.69469 | -0.98621 | -2.51629 |
| H  | -6.53869 | -1.14290 | -2.95796 |
| H  | -4.90160 | -1.36424 | 2.99087  |
| H  | -5.03395 | -1.50405 | -2.99318 |
| H  | -3.00407 | -1.37269 | -0.06882 |
| H  | -4.98812 | 1.62159  | -0.10850 |

**Table S25:** DFT optimized XYZ coordinates of  $[NpO(OH)_3(H_2O)_2]_{(aq)}^+$ 

|    |          |          |          |
|----|----------|----------|----------|
| Np | -5.49938 | -1.07438 | -0.11021 |
| O  | -5.75937 | 0.99191  | -0.01904 |
| O  | -3.54157 | -0.75917 | -0.10554 |
| O  | -7.24870 | -1.26772 | -0.09692 |
| O  | -5.18404 | -3.01835 | 0.55209  |
| O  | -5.55591 | -0.73102 | 2.33372  |
| H  | -5.50848 | 0.17191  | 2.67434  |
| O  | -5.81456 | -0.79479 | -2.56045 |
| H  | -6.61880 | -1.10845 | -2.99385 |
| H  | -5.02701 | -1.28930 | 2.91823  |
| H  | -5.09158 | -0.89595 | -3.19372 |
| H  | -2.91201 | -1.47815 | 0.07673  |
| H  | -4.95948 | 1.53960  | -0.02448 |
| H  | -5.90712 | -3.63861 | 0.72207  |

**Table S26:** DFT optimized XYZ coordinates of  $[Np(OH)_4(H_2O)_2]_{(aq)}^{2+}$ 

|    |          |          |          |
|----|----------|----------|----------|
| Np | -5.42519 | -1.03048 | 0.09892  |
| O  | -5.72919 | 0.91759  | 0.03595  |
| O  | -3.54105 | -0.72610 | -0.44859 |
| O  | -7.38026 | -1.31023 | 0.11920  |
| O  | -5.16874 | -2.97964 | -0.13989 |
| O  | -5.71987 | -0.55610 | 2.50425  |
| H  | -5.73792 | 0.33798  | 2.87137  |
| O  | -5.75537 | -1.00986 | -2.25855 |
| H  | -6.51683 | -1.43502 | -2.67838 |
| H  | -5.48017 | -1.16796 | 3.21343  |
| H  | -5.00815 | -1.06215 | -2.87181 |
| H  | -2.82791 | -1.39139 | -0.42601 |
| H  | -5.04244 | 1.59632  | -0.10580 |
| H  | -5.83863 | -3.65848 | 0.06722  |
| H  | -8.06608 | -0.64733 | 0.32378  |

**Table S27:** DFT optimized XYZ coordinates of  $[NpO_3(OH)_3]_{(aq)}^{3-}$ 

|    |          |          |          |
|----|----------|----------|----------|
| Np | -5.42404 | -0.90455 | 0.01906  |
| O  | -5.53441 | 0.97164  | 0.00687  |
| O  | -3.45975 | -0.90501 | -0.08372 |
| O  | -7.73638 | -0.89837 | -0.03846 |
| O  | -5.52570 | -2.77498 | 0.12142  |
| O  | -5.47088 | -0.84349 | 2.38319  |
| H  | -5.41698 | 0.07981  | 2.64882  |
| O  | -5.56309 | -0.97813 | -2.37410 |
| H  | -6.50035 | -0.86464 | -2.56556 |
| H  | -7.98056 | 0.03292  | -0.05447 |

**Table S28:** DFT optimized XYZ coordinates of  $cis[NpO_2(OH)_4]_{(aq)}^{2-}$ 

|    |          |          |          |
|----|----------|----------|----------|
| Np | -5.45248 | -0.78850 | -0.00432 |
| O  | -5.51054 | 1.08590  | -0.05601 |
| O  | -3.58953 | -0.97744 | -0.09764 |
| O  | -7.63624 | -0.83056 | -0.01077 |
| O  | -5.57550 | -2.97063 | 0.16829  |
| O  | -5.44184 | -0.68711 | 2.26406  |
| H  | -5.42414 | 0.21540  | 2.59663  |
| O  | -5.54060 | -0.94578 | -2.27184 |
| H  | -6.37548 | -0.60162 | -2.60736 |
| H  | -8.03593 | 0.04109  | 0.07932  |
| H  | -6.50977 | -3.20847 | 0.23600  |

**Table S29:** DFT optimized XYZ coordinates of  $trans[NpO_2(OH)_4]_{(aq)}^{2-}$ 

|    |          |          |          |
|----|----------|----------|----------|
| Np | -5.64364 | -0.80523 | 0.02585  |
| O  | -5.52899 | 1.00299  | 0.07556  |
| O  | -3.38573 | -0.92869 | -0.07318 |
| O  | -7.90151 | -0.68177 | 0.12488  |
| O  | -5.75828 | -2.61344 | -0.02387 |
| O  | -5.54558 | -0.89029 | 2.28815  |
| H  | -5.46954 | -0.01053 | 2.67170  |
| O  | -5.74168 | -0.72015 | -2.23645 |
| H  | -5.81769 | -1.59993 | -2.62000 |
| H  | -8.20371 | 0.23161  | 0.16003  |
| H  | -3.08359 | -1.84209 | -0.10830 |

**Table S30:** DFT optimized XYZ coordinates of  $[NpO(OH)_5]_{(aq)}^-$ 

|    |          |          |          |
|----|----------|----------|----------|
| Np | -5.54511 | -0.83819 | 0.05437  |
| O  | -5.61892 | 0.96398  | -0.08543 |
| O  | -3.37281 | -0.74536 | -0.02951 |
| O  | -7.70831 | -0.91989 | 0.11889  |
| O  | -5.44857 | -2.89956 | 0.24935  |
| O  | -5.45948 | -0.72016 | 2.20918  |
| H  | -5.50516 | 0.14443  | 2.63171  |
| O  | -5.60821 | -1.12617 | -2.08450 |
| H  | -5.86121 | -0.40015 | -2.66477 |
| H  | -8.17612 | -0.07811 | 0.09012  |
| H  | -2.94388 | -1.60912 | 0.00240  |
| H  | -5.57294 | -3.39209 | -0.57490 |

**Table S31:** DFT optimized XYZ coordinates of  $[Np(OH)_6]_{(aq)}$ 

|    |          |          |          |
|----|----------|----------|----------|
| Np | -5.52193 | -0.89686 | -0.06107 |
| O  | -5.38026 | 1.15971  | 0.09578  |
| O  | -3.47333 | -1.15519 | -0.23286 |
| O  | -7.58616 | -0.72044 | -0.03591 |
| O  | -5.82367 | -2.95035 | -0.13830 |
| O  | -5.32920 | -1.00612 | 2.00136  |
| H  | -5.48321 | -0.21817 | 2.54219  |
| O  | -5.53588 | -0.75879 | -2.12994 |
| H  | -6.35968 | -0.87589 | -2.62357 |
| H  | -7.99151 | 0.13791  | 0.15283  |
| H  | -2.94261 | -1.23825 | 0.57246  |
| H  | -5.07673 | -3.54967 | 0.00137  |
| H  | -5.04196 | 1.72666  | -0.61075 |

**Table S32:** DFT optimized XYZ coordinates of  $[NpO_3(OH)_2(H_2O)]_{(aq)}^{2-}$ 

|    |          |          |          |
|----|----------|----------|----------|
| Np | -6.06362 | -1.60759 | -0.00860 |
| O  | -6.51901 | -0.03718 | 0.85770  |
| O  | -4.33783 | -1.70204 | 0.94897  |
| O  | -8.19659 | -1.72008 | -0.76237 |
| O  | -5.77247 | -3.19127 | -0.89920 |
| O  | -4.01972 | 0.56172  | 2.29620  |
| H  | -4.90552 | 0.86360  | 2.05062  |
| O  | -5.33447 | -0.44771 | -1.82124 |
| H  | -5.33798 | 0.50055  | -1.65845 |
| H  | -8.66577 | -0.93001 | -0.47264 |
| H  | -4.02576 | -0.32575 | 1.82660  |

**Table S33:** DFT optimized XYZ coordinates of  $cis[NpO_3(OH)_3(H_2O)]_{(aq)}^-$ 

|    |          |          |          |
|----|----------|----------|----------|
| Np | -5.53676 | -0.90751 | -0.10815 |
| O  | -5.51674 | 0.93909  | -0.18717 |
| O  | -3.69922 | -1.15144 | -0.11002 |
| O  | -7.65685 | -0.83557 | 0.23355  |
| O  | -5.70522 | -3.03927 | 0.07757  |
| O  | -5.26538 | -0.73393 | 2.47923  |
| H  | -5.79614 | -0.06085 | 2.92321  |
| O  | -5.78017 | -1.07080 | -2.30505 |
| H  | -5.86532 | -0.25055 | -2.80004 |
| H  | -8.08045 | 0.01542  | 0.07342  |
| H  | -6.63968 | -3.28850 | 0.10905  |
| H  | -4.35232 | -0.57375 | 2.74859  |

**Table S34:** DFT optimized XYZ coordinates of  $trans[NpO_3(OH)_3(H_2O)]_{(aq)}^-$ 

|    |          |          |          |
|----|----------|----------|----------|
| Np | -5.68284 | -0.79017 | -0.10822 |
| O  | -5.58125 | 1.00013  | -0.06443 |
| O  | -3.47807 | -0.90452 | 0.02587  |
| O  | -7.87807 | -0.67888 | 0.13607  |
| O  | -5.78065 | -2.58017 | -0.06095 |
| O  | -5.59181 | -0.78514 | 2.48781  |
| H  | -5.23795 | 0.01864  | 2.88865  |
| O  | -5.74839 | -0.76508 | -2.31936 |
| H  | -5.79554 | -1.62913 | -2.74108 |
| H  | -8.22537 | 0.21981  | 0.13498  |
| H  | -3.13379 | -1.80389 | -0.00470 |
| H  | -5.11372 | -1.51765 | 2.89611  |

**Table S35:** DFT optimized XYZ coordinates of  $[NpO_2(OH)_4(H_2O)]_{(aq)}$ 

|    |          |          |          |
|----|----------|----------|----------|
| Np | -5.51424 | -0.87441 | -0.07983 |
| O  | -5.65262 | 0.90489  | -0.06859 |
| O  | -3.40513 | -0.68445 | -0.01714 |
| O  | -7.59976 | -1.09268 | 0.08019  |
| O  | -5.30084 | -2.89129 | 0.04101  |
| O  | -5.47784 | -0.64920 | 2.43430  |
| H  | -5.15404 | 0.18312  | 2.80196  |
| O  | -5.57801 | -0.96122 | -2.19945 |
| H  | -5.74405 | -0.19826 | -2.76334 |
| H  | -8.21198 | -0.36696 | -0.09307 |
| H  | -2.90537 | -1.51135 | -0.06516 |
| H  | -6.04972 | -3.45714 | -0.20282 |
| H  | -5.11247 | -1.35496 | 2.98361  |

**Table S36:** DFT optimized XYZ coordinates of  $[NpO_2(OH)_5(H_2O)]_{(aq)}^+$ 

|    |          |          |          |
|----|----------|----------|----------|
| Np | -5.57400 | -0.92839 | -0.03385 |
| O  | -5.54381 | 1.08577  | -0.11024 |
| O  | -3.56729 | -1.11119 | -0.00336 |
| O  | -7.59025 | -0.83742 | 0.09875  |
| O  | -5.77579 | -2.91895 | 0.28784  |
| O  | -5.55212 | -0.72717 | 2.39833  |
| H  | -5.19235 | 0.05809  | 2.83415  |
| O  | -5.52908 | -1.10079 | -2.06619 |
| H  | -5.99215 | -0.69092 | -2.80852 |
| H  | -8.05746 | 0.00125  | -0.05275 |
| H  | -2.98660 | -1.15873 | -0.77976 |
| H  | -5.04893 | -3.54832 | 0.15073  |
| H  | -4.81780 | 1.64538  | -0.43042 |
| H  | -5.35976 | -1.48852 | 2.96323  |



**Table S37:** DFT optimized XYZ coordinates of  $H_3O_{(aq)}^+$ 

|   |          |          |          |
|---|----------|----------|----------|
| O | -0.17411 | -1.45771 | 0.22714  |
| H | 0.74696  | -1.58807 | -0.07859 |
| H | -0.52041 | -0.59421 | -0.07786 |
| H | -0.74876 | -2.18866 | -0.08011 |

**Table S38:** DFT optimized XYZ coordinates of  $H_2O_{(aq)}$ 

|   |          |          |         |
|---|----------|----------|---------|
| O | -0.17854 | -1.52568 | 0.00000 |
| H | 0.78474  | -1.48419 | 0.00000 |
| H | -0.46098 | -0.60380 | 0.00000 |

**Table S39:** DFT optimized XYZ coordinates of  $OH_{(aq)}^-$ 

|   |          |          |         |
|---|----------|----------|---------|
| O | -0.69144 | -0.16869 | 0.00000 |
| H | -1.01342 | 0.74054  | 0.00000 |

**Table S40:** DFT optimized XYZ coordinates of  $O_{2(aq)}^{2-}$ 

|   |          |          |         |
|---|----------|----------|---------|
| O | -0.26678 | -1.08410 | 0.00000 |
| O | 1.33218  | -1.19438 | 0.00000 |

**Table S41:** DFT optimized XYZ coordinates of  $O_{2(aq)}^{-*}$ 

|   |          |          |         |
|---|----------|----------|---------|
| O | -0.13941 | -1.09289 | 0.00000 |
| O | 1.20481  | -1.18559 | 0.00000 |

**Table S42:** DFT optimized XYZ coordinates of  $HO_{2(aq)}^-$ 

|   |          |          |          |
|---|----------|----------|----------|
| O | -0.35439 | -1.00051 | -0.07295 |
| O | 1.13213  | -1.28232 | 0.09570  |
| H | -0.69145 | -1.64622 | 0.55633  |

**Table S43:** DFT optimized XYZ coordinates of  $NO_{3(aq)}^-$ 

|   |          |          |         |
|---|----------|----------|---------|
| O | 1.23976  | 0.18942  | 0.00003 |
| O | -0.45584 | -1.16847 | 0.00003 |
| O | -0.78390 | 0.97906  | 0.00003 |
| N | -0.00003 | -0.00001 | 0.00003 |

**Table S44:** DFT optimized XYZ coordinates of  $NO_{3(aq)}^{*}$ 

|   |          |          |         |
|---|----------|----------|---------|
| O | 1.21520  | 0.18942  | 0.00001 |
| O | -0.44333 | -1.14733 | 0.00005 |
| O | -0.77152 | 0.95794  | 0.00002 |
| N | -0.00035 | -0.00003 | 0.00003 |

**Table S45:** DFT optimized XYZ coordinates of  $CO_{3(aq)}^{2-}$ 

|   |          |          |          |
|---|----------|----------|----------|
| C | -0.45247 | -0.48135 | -2.21460 |
| O | 0.19389  | 0.64234  | -2.21460 |
| O | 0.19370  | -1.60513 | -2.21460 |

|   |          |          |          |
|---|----------|----------|----------|
| O | -1.74951 | -0.48125 | -2.21460 |
|---|----------|----------|----------|

**Table S46:** DFT optimized XYZ coordinates of  $CO_3^{2-}$

|   |          |          |          |
|---|----------|----------|----------|
| C | -0.45359 | -0.48134 | -2.21460 |
| O | 0.18472  | 0.61655  | -2.21460 |
| O | 0.17803  | -1.58310 | -2.21460 |
| O | -1.72355 | -0.47751 | -2.21460 |

**Table S47:** DFT optimized XYZ coordinates of  $[Co(NH_3)_6]^{3+}$

|    |          |          |          |
|----|----------|----------|----------|
| Co | -1.73560 | 0.93209  | -0.00567 |
| N  | -1.75904 | 0.91786  | 2.02882  |
| H  | -2.43523 | 0.26431  | 2.43142  |
| H  | -0.86739 | 0.66246  | 2.45993  |
| N  | -1.71230 | 0.94640  | -2.04017 |
| H  | -2.60362 | 1.20322  | -2.47114 |
| H  | -1.03518 | 1.59896  | -2.44281 |
| N  | -1.77303 | -1.10208 | -0.03237 |
| H  | -2.44202 | -1.49619 | -0.69839 |
| H  | -0.87913 | -1.53076 | -0.28460 |
| N  | -3.76966 | 0.98192  | -0.01662 |
| H  | -4.18393 | 1.23594  | 0.88355  |
| H  | -4.16477 | 1.65461  | -0.67829 |
| N  | -1.69797 | 2.96624  | 0.02092  |
| H  | -1.03019 | 3.36029  | 0.68818  |
| H  | -1.45068 | 3.39601  | -0.87367 |
| N  | 0.29844  | 0.88222  | 0.00538  |
| H  | 0.74162  | 1.77137  | 0.24855  |
| H  | 0.69344  | 0.20928  | 0.66687  |
| H  | 0.71280  | 0.62849  | -0.89482 |
| H  | -4.21285 | 0.09268  | -0.25942 |
| H  | -2.01850 | -1.53201 | 0.86264  |
| H  | -1.99573 | 1.82046  | 2.44803  |
| H  | -2.59227 | 3.39514  | 0.27136  |
| H  | -1.47707 | 0.04347  | -2.45950 |

**Table S48:** DFT optimized XYZ coordinates of  $[Co(NH_3)_6Cl]_{(aq)}^{2+}$ 

|    |          |          |          |
|----|----------|----------|----------|
| Co | -1.75576 | 0.98169  | -0.00595 |
| N  | -1.77837 | 0.89899  | 2.00823  |
| H  | -2.09406 | -0.04414 | 2.24442  |
| H  | -0.86702 | 0.99879  | 2.45391  |
| N  | -1.75744 | 0.90614  | -2.02060 |
| H  | -2.61195 | 1.23061  | -2.47137 |
| H  | -0.99858 | 1.38960  | -2.49950 |
| N  | -3.77313 | 0.98979  | -0.01186 |
| H  | -4.21231 | 1.27032  | 0.86418  |
| H  | -4.23035 | 1.54279  | -0.73593 |
| N  | -1.64490 | 3.03698  | -0.00596 |
| H  | -1.24224 | 3.42111  | 0.84855  |
| H  | -1.07213 | 3.40968  | -0.76278 |
| N  | 0.25137  | 0.80641  | 0.01458  |
| H  | 0.76685  | 1.44793  | 0.61640  |
| H  | 0.44591  | -0.14319 | 0.33862  |
| H  | 0.69554  | 0.87100  | -0.90043 |
| H  | -4.04681 | 0.01628  | -0.16368 |
| H  | -2.39355 | 1.55444  | 2.48929  |
| H  | -2.55034 | 3.49544  | -0.10431 |
| H  | -1.67386 | -0.08582 | -2.25451 |
| Cl | -1.85370 | -1.24505 | -0.00726 |

**Table S49:** DFT optimized XYZ coordinates of  $cis[Co(NH_3)_6Cl_2]_{(aq)}^+$ 

|    |          |          |          |
|----|----------|----------|----------|
| Co | -1.75918 | 0.98428  | -0.02596 |
| N  | -1.76373 | 0.85647  | -2.05880 |
| H  | -2.57197 | 1.25713  | -2.52789 |
| H  | -0.94159 | 1.22552  | -2.52967 |
| N  | -3.75374 | 0.93620  | 0.06887  |
| H  | -3.98907 | 1.15924  | 1.03545  |
| H  | -4.31867 | 1.51785  | -0.54439 |
| N  | -1.71956 | 3.02096  | -0.04511 |
| H  | -1.71209 | 3.25153  | 0.94990  |
| H  | -0.89709 | 3.44622  | -0.46527 |
| N  | 0.23221  | 0.85909  | 0.06505  |
| H  | 0.47781  | 1.07313  | 1.03110  |
| H  | 0.45308  | -0.12519 | -0.08271 |
| H  | 0.81813  | 1.41816  | -0.54951 |
| H  | -4.01292 | -0.03869 | -0.07882 |
| H  | -2.52749 | 3.47800  | -0.46010 |
| H  | -1.78344 | -0.15232 | -2.21760 |
| Cl | -1.80259 | -1.26157 | -0.02994 |
| Cl | -1.75371 | 1.15108  | 2.21420  |

**Table S50:** DFT optimized XYZ coordinates of  $trans[Co(NH_3)_6Cl_2]_{(aq)}^+$ 

|    |          |          |          |
|----|----------|----------|----------|
| Co | -1.74633 | 0.91906  | -0.00851 |
| N  | -1.73801 | 0.94223  | 1.98484  |
| H  | -2.25226 | 0.14144  | 2.34668  |
| H  | -0.80627 | 0.88762  | 2.38766  |
| N  | -1.75465 | 0.89589  | -2.00186 |
| H  | -2.68640 | 0.95047  | -2.40469 |
| H  | -1.24042 | 1.69669  | -2.36371 |
| N  | -3.73533 | 1.05204  | -0.00202 |
| H  | -4.13686 | 1.08920  | 0.93114  |
| H  | -4.03087 | 1.90468  | -0.47350 |
| N  | 0.24267  | 0.78608  | -0.01501 |
| H  | 0.65000  | 1.60188  | 0.43795  |
| H  | 0.53821  | -0.06658 | 0.45643  |
| H  | 0.64420  | 0.74898  | -0.94817 |
| H  | -4.14266 | 0.23623  | -0.45493 |
| H  | -2.14563 | 1.81012  | 2.32719  |
| H  | -1.34701 | 0.02800  | -2.34421 |
| Cl | -1.89625 | -1.32632 | 0.01804  |
| Cl | -1.59641 | 3.16444  | -0.03507 |

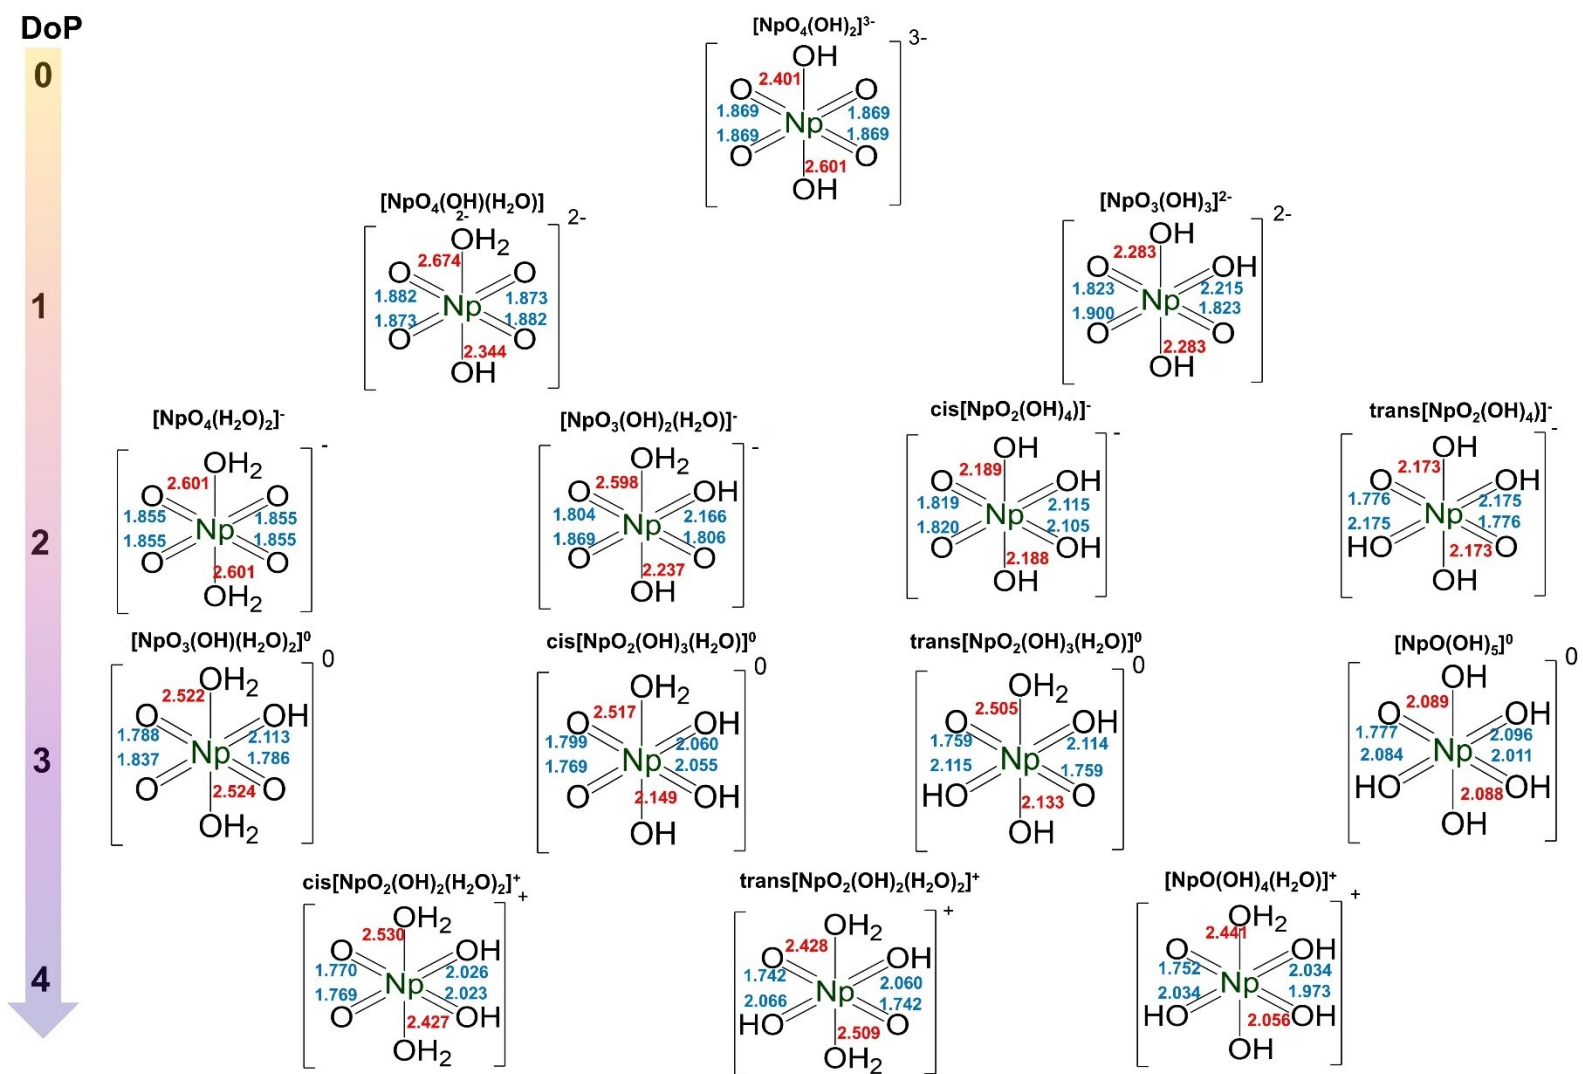

Figure S1: DFT optimized bond lengths. Here DoP stands for Degree of Protonation

## 1.2 Np(VII) Protonation reactions and their energetics.

**Table S51:** Protonation reactions of Np(VII) complexes

| $\Delta$<br>DoP | Reaction                                                                                                        | $\Delta G$<br>(kJ/mol) |
|-----------------|-----------------------------------------------------------------------------------------------------------------|------------------------|
| 0→1             | $[NpO_4(OH)_2]_{(aq)}^{3-} + H_3O_{(aq)}^+ \rightarrow [NpO_4(OH)(H_2O)]_{(aq)}^{2-} + H_2O_{(aq)}$             | -326.23                |
| 0→1             | $[NpO_4(OH)_2]_{(aq)}^{3-} + H_3O_{(aq)}^+ \rightarrow [NpO_3(OH)_3]_{(aq)}^{2-} + H_2O_{(aq)}$                 | -291.20                |
| 1→2             | $[NpO_4(OH)(H_2O)]_{(aq)}^{2-} + H_3O_{(aq)}^+ \rightarrow [NpO_4(H_2O)_2]_{(aq)}^{-} + H_2O_{(aq)}$            | -260.60                |
| 1→2             | $[NpO_4(OH)(H_2O)]_{(aq)}^{2-} + H_3O_{(aq)}^+ \rightarrow [NpO_3(OH)_2(H_2O)]_{(aq)}^{-} + H_2O_{(aq)}$        | -267.18                |
| 1→2             | $[NpO_3(OH)_3]_{(aq)}^{2-} + H_3O_{(aq)}^+ \rightarrow cis[NpO_2(OH)_4]_{(aq)}^{-} + H_2O_{(aq)}$               | -182.54                |
| 1→2             | $[NpO_3(OH)_3]_{(aq)}^{2-} + H_3O_{(aq)}^+ \rightarrow trans[NpO_2(OH)_4]_{(aq)}^{-} + H_2O_{(aq)}$             | -252.16                |
| 2→3             | $[NpO_4(H_2O)_2]_{(aq)}^{-} + H_3O_{(aq)}^+ \rightarrow [NpO_3(OH)(H_2O)_2]_{(aq)} + H_2O_{(aq)}$               | -211.69                |
| 2→3             | $[NpO_3(OH)_2(H_2O)]_{(aq)}^{-} + H_3O_{(aq)}^+ \rightarrow cis[NpO_3(OH)_3(H_2O)]_{(aq)} + H_2O_{(aq)}$        | -120.87                |
| 2→3             | $[NpO_3(OH)_2(H_2O)]_{(aq)}^{-} + H_3O_{(aq)}^+ \rightarrow trans[NpO_3(OH)_3(H_2O)]_{(aq)} + H_2O_{(aq)}$      | -178.56                |
| 2→3             | $cis[NpO_2(OH)_4]_{(aq)}^{-} + H_3O_{(aq)}^+ \rightarrow [NpO(OH)_5]_{(aq)} + H_2O_{(aq)}$                      | -127.16                |
| 2→3             | $trans[NpO_2(OH)_4]_{(aq)}^{-} + H_3O_{(aq)}^+ \rightarrow [NpO(OH)_5]_{(aq)} + H_2O_{(aq)}$                    | -59.15                 |
| 3→4             | $[NpO_3(OH)(H_2O)_2]_{(aq)} + H_3O_{(aq)}^+ \rightarrow cis[NpO_2(OH)_2(H_2O)_2]_{(aq)}^+ + H_2O_{(aq)}$        | -47.43                 |
| 3→4             | $[NpO_3(OH)(H_2O)_2]_{(aq)} + H_3O_{(aq)}^+ \rightarrow trans[NpO_2(OH)_2(H_2O)_2]_{(aq)}^+ + H_2O_{(aq)}$      | -89.63                 |
| 3→4             | $cis[NpO_2(OH)_3(H_2O)]_{(aq)} + H_3O_{(aq)}^+ \rightarrow [NpO(OH)_4(H_2O)]_{(aq)}^+ + H_2O_{(aq)}$            | -45.87                 |
| 3→4             | $trans[NpO_2(OH)_3(H_2O)]_{(aq)} + H_3O_{(aq)}^+ \rightarrow [NpO(OH)_4(H_2O)]_{(aq)}^+ + H_2O_{(aq)}$          | 10.97                  |
| 3→4             | $[NpO(OH)_5]_{(aq)} + H_3O_{(aq)}^+ \rightarrow [Np(OH)_6]_{(aq)}^+ + H_2O_{(aq)}$                              | 2.67                   |
| 4→5             | $cis[NpO_2(OH)_2(H_2O)_2]_{(aq)}^+ + H_3O_{(aq)}^+ \rightarrow [NpO(OH)_3(H_2O)_2]_{(aq)}^{2+} + H_2O_{(aq)}$   | 52.28                  |
| 4→5             | $trans[NpO_2(OH)_2(H_2O)_2]_{(aq)}^+ + H_3O_{(aq)}^+ \rightarrow [NpO(OH)_3(H_2O)_2]_{(aq)}^{2+} + H_2O_{(aq)}$ | 109.82                 |
| 4→5             | $[NpO_2(OH)_4(H_2O)]_{(aq)}^+ + H_3O_{(aq)}^+ \rightarrow [NpO(OH)_5(H_2O)]_{(aq)}^{2+} + H_2O_{(aq)}$          | 109.83                 |
| 4→5             | $[Np(OH)_6]_{(aq)}^+ + H_3O_{(aq)}^+ \rightarrow [NpO(OH)_5(H_2O)]_{(aq)}^{2+} + H_2O_{(aq)}$                   | 16.60                  |
| 5→6             | $[NpO(OH)_3(H_2O)_2]_{(aq)}^{2+} + H_3O_{(aq)}^+ \rightarrow [Np(OH)_4(H_2O)_2]_{(aq)}^{3+} + H_2O_{(aq)}$      | 337.20                 |
| 5→6             | $[NpO(OH)_5(H_2O)]_{(aq)}^{2+} + H_3O_{(aq)}^+ \rightarrow [Np(OH)_4(H_2O)_2]_{(aq)}^{3+} + H_2O_{(aq)}$        | 851.57                 |

**Table S52:** Protonation reactions of Np(VI) complexes

| $\Delta$<br>DoP | Reaction                                                                                                        | $\Delta G$<br>(kJ/mol) |
|-----------------|-----------------------------------------------------------------------------------------------------------------|------------------------|
| 0→1             | $[NpO_4(OH)_2]_{(aq)}^{4-} + H_3O_{(aq)}^+ \rightarrow [NpO_4(OH)(H_2O)]_{(aq)}^{3-} + H_2O_{(aq)}$             | -427.37                |
| 0→1             | $[NpO_4(OH)_2]_{(aq)}^{4-} + H_3O_{(aq)}^+ \rightarrow [NpO_3(OH)_3]_{(aq)}^{3-} + H_2O_{(aq)}$                 | -366.78                |
| 1→2             | $[NpO_4(OH)(H_2O)]_{(aq)}^{3-} + H_3O_{(aq)}^+ \rightarrow [NpO_4(H_2O)_2]_{(aq)}^{2-} + H_2O_{(aq)}$           | -310.95                |
| 1→2             | $[NpO_4(OH)(H_2O)]_{(aq)}^{3-} + H_3O_{(aq)}^+ \rightarrow [NpO_3(OH)_2(H_2O)]_{(aq)}^{2-} + H_2O_{(aq)}$       | -375.76                |
| 1→2             | $[NpO_3(OH)_3]_{(aq)}^{3-} + H_3O_{(aq)}^+ \rightarrow cis[NpO_2(OH)_4]_{(aq)}^{2-} + H_2O_{(aq)}$              | -306.38                |
| 1→2             | $[NpO_3(OH)_3]_{(aq)}^{3-} + H_3O_{(aq)}^+ \rightarrow trans[NpO_2(OH)_4]_{(aq)}^{2-} + H_2O_{(aq)}$            | -383.24                |
| 2→3             | $[NpO_4(H_2O)_2]_{(aq)}^{2-} + H_3O_{(aq)}^+ \rightarrow [NpO_3(OH)(H_2O)_2]_{(aq)}^{-} + H_2O_{(aq)}$          | -286.71                |
| 2→3             | $[NpO_3(OH)_2(H_2O)]_{(aq)}^{2-} + H_3O_{(aq)}^+ \rightarrow cis[NpO_3(OH)_3(H_2O)]_{(aq)}^{-} + H_2O_{(aq)}$   | -228.59                |
| 2→3             | $[NpO_3(OH)_2(H_2O)]_{(aq)}^{2-} + H_3O_{(aq)}^+ \rightarrow trans[NpO_3(OH)_3(H_2O)]_{(aq)}^{-} + H_2O_{(aq)}$ | -300.16                |
| 2→3             | $cis[NpO_2(OH)_4]_{(aq)}^{2-} + H_3O_{(aq)}^+ \rightarrow [NpO(OH)_5]_{(aq)}^{-} + H_2O_{(aq)}$                 | -121.35                |
| 2→3             | $trans[NpO_2(OH)_4]_{(aq)}^{2-} + H_3O_{(aq)}^+ \rightarrow [NpO(OH)_5]_{(aq)}^{-} + H_2O_{(aq)}$               | -44.48                 |
| 3→4             | $[NpO_3(OH)(H_2O)_2]_{(aq)}^{-} + H_3O_{(aq)}^+ \rightarrow cis[NpO_2(OH)_2(H_2O)_2]_{(aq)} + H_2O_{(aq)}$      | -207.00                |
| 3→4             | $[NpO_3(OH)(H_2O)_2]_{(aq)}^{-} + H_3O_{(aq)}^+ \rightarrow trans[NpO_2(OH)_2(H_2O)_2]_{(aq)} + H_2O_{(aq)}$    | -268.26                |
| 3→4             | $cis[NpO_2(OH)_3(H_2O)]_{(aq)}^{-} + H_3O_{(aq)}^+ \rightarrow [NpO(OH)_4(H_2O)]_{(aq)} + H_2O_{(aq)}$          | -188.61                |
| 3→4             | $trans[NpO_2(OH)_3(H_2O)]_{(aq)}^{-} + H_3O_{(aq)}^+ \rightarrow [NpO(OH)_4(H_2O)]_{(aq)} + H_2O_{(aq)}$        | -117.04                |
| 3→4             | $[NpO(OH)_5]_{(aq)}^{-} + H_3O_{(aq)}^+ \rightarrow [Np(OH)_6]_{(aq)} + H_2O_{(aq)}$                            | -265.18                |
| 4→5             | $cis[NpO_2(OH)_2(H_2O)_2]_{(aq)} + H_3O_{(aq)}^+ \rightarrow [NpO(OH)_3(H_2O)_2]_{(aq)}^+ + H_2O_{(aq)}$        | -94.05                 |
| 4→5             | $trans[NpO_2(OH)_2(H_2O)_2]_{(aq)} + H_3O_{(aq)}^+ \rightarrow [NpO(OH)_3(H_2O)_2]_{(aq)}^+ + H_2O_{(aq)}$      | -52.93                 |
| 4→5             | $[NpO_2(OH)_4(H_2O)]_{(aq)} + H_3O_{(aq)}^+ \rightarrow [NpO(OH)_5(H_2O)]_{(aq)}^+ + H_2O_{(aq)}$               | -52.93                 |
| 4→5             | $[Np(OH)_6]_{(aq)} + H_3O_{(aq)}^+ \rightarrow [NpO(OH)_5(H_2O)]_{(aq)}^+ + H_2O_{(aq)}$                        | -92.39                 |
| 5→6             | $[NpO(OH)_3(H_2O)_2]_{(aq)}^+ + H_3O_{(aq)}^+ \rightarrow [Np(OH)_4(H_2O)_2]_{(aq)}^{2+} + H_2O_{(aq)}$         | 12.74                  |
| 5→6             | $[NpO(OH)_5(H_2O)]_{(aq)}^+ + H_3O_{(aq)}^+ \rightarrow [Np(OH)_4(H_2O)_2]_{(aq)}^{2+} + H_2O_{(aq)}$           | 541.57                 |

### 1.3 Influence of protonation on reduction of Np(VII)

**Table S53:** Free energy changes associated with the reduction of Np(VII) to corresponding Np(VI) compounds with different reducing agents.

| Np(VII)<br>reduction half<br>reaction | Reaction $\Delta G$ (kJ/mol) |                |                  |                   |               |                |
|---------------------------------------|------------------------------|----------------|------------------|-------------------|---------------|----------------|
|                                       | Reducing agent               |                |                  |                   |               |                |
|                                       | $O_{2(aq)}^{2-}$             | $HO_{2(aq)}^-$ | $O_{2(aq)}^{-*}$ | $CO_{3(aq)}^{2-}$ | $Cl_{(aq)}^-$ | $NO_{3(aq)}^-$ |
| I                                     | -311.44                      | -124.84        | -218.86          | 384.33            | 381.76        | 377.75         |
| II                                    | -384.72                      | -198.12        | -292.13          | 311.05            | 308.49        | 304.47         |
| III                                   | -412.58                      | -225.98        | -320.00          | 283.19            | 280.62        | 276.61         |
| IV                                    | -435.06                      | -248.47        | -342.48          | 260.70            | 258.14        | 254.12         |
| V                                     | -493.29                      | -306.69        | -400.71          | 202.48            | 199.91        | 195.90         |
| VI                                    | -536.42                      | -349.82        | -451.08          | 159.35            | 156.78        | 152.77         |
| VII                                   | -543.66                      | -357.06        | -451.08          | 152.11            | 149.54        | 145.53         |
| VIII                                  | -510.14                      | -323.54        | -417.55          | 185.63            | 183.07        | 179.05         |
| IX                                    | -600.35                      | -413.75        | -507.76          | 95.42             | 92.86         | 88.84          |
| X                                     | -615.08                      | -428.48        | -522.50          | 80.69             | 78.12         | 74.11          |
| XI                                    | -529.00                      | -342.40        | -436.42          | 166.77            | 164.20        | 160.19         |
| XII                                   | -743.08                      | -556.49        | -650.50          | -47.32            | -49.88        | -53.90         |
| XIII                                  | -669.71                      | -483.11        | -577.13          | 26.06             | 23.49         | 19.48          |
| XIV                                   | -688.76                      | -502.16        | -596.18          | 7.00              | 4.44          | 0.43           |

**Table S54:** Spin densities and oxidation states of Np centers in Np(VI) and Np(VII) complexes.

| Compound                              | Np Oxidation state | Np Spin Density |
|---------------------------------------|--------------------|-----------------|
| $[NpO_4(OH)_2]_{(aq)}^{3-}$           | VII                | 0.000           |
| $[NpO_4(OH)(H_2O)]_{(aq)}^{2-}$       | VII                | 0.000           |
| $[NpO_3(OH)_3]_{(aq)}^{2-}$           | VII                | 0.000           |
| $[NpO_4(H_2O)_2]_{(aq)}^-$            | VII                | 0.000           |
| $[NpO_3(OH)_2(H_2O)]_{(aq)}^-$        | VII                | 0.000           |
| $cis[NpO_2(OH)_4]_{(aq)}^-$           | VII                | 0.000           |
| $trans[NpO_2(OH)_4]_{(aq)}^-$         | VII                | 0.000           |
| $[NpO_3(OH)(H_2O)_2]_{(aq)}$          | VII                | 0.000           |
| $cis[NpO_2(OH)_3(H_2O)]_{(aq)}$       | VII                | 0.000           |
| $trans[NpO_2(OH)_3(H_2O)]_{(aq)}$     | VII                | 0.000           |
| $[NpO(OH)_5]_{(aq)} + H_3O_{(aq)}^+$  | VII                | 0.000           |
| $cis[NpO_2(OH)_2(H_2O)_2]_{(aq)}^+$   | VII                | 0.000           |
| $trans[NpO_2(OH)_2(H_2O)_2]_{(aq)}^+$ | VII                | 0.000           |
| $[NpO_2(OH)_4(H_2O)]_{(aq)}^+$        | VII                | 0.000           |
| $[Np(OH)_6]_{(aq)}^+$                 | VII                | 0.000           |
| $[NpO(OH)_3(H_2O)_2]_{(aq)}^{2+}$     | VII                | 0.000           |
| $[NpO(OH)_5(H_2O)]_{(aq)}^{2+}$       | VII                | 0.000           |



|                                       |     |       |
|---------------------------------------|-----|-------|
| $[Np(OH)_4(H_2O)_2]_{(aq)}^{3+}$      | VII | 0.000 |
| $[NpO_4(OH)_2]_{(aq)}^{4-}$           | VI  | 1.145 |
| $[NpO_4(OH)(H_2O)]_{(aq)}^{3-}$       | VI  | 1.189 |
| $[NpO_3(OH)_3]_{(aq)}^{3-}$           | VI  | 1.132 |
| $[NpO_4(H_2O)_2]_{(aq)}^{2-}$         | VI  | 1.215 |
| $[NpO_3(OH)_2(H_2O)]_{(aq)}^{2-}$     | VI  | 1.167 |
| $cis[NpO_2(OH)_4]_{(aq)}^{2-}$        | VI  | 1.121 |
| $trans[NpO_2(OH)_4]_{(aq)}^{2-}$      | VI  | 1.198 |
| $[NpO_3(OH)(H_2O)_2]_{(aq)}^{-}$      | VI  | 1.154 |
| $cis[NpO_2(OH)_3(H_2O)]_{(aq)}^{-}$   | VI  | 1.178 |
| $trans[NpO_2(OH)_3(H_2O)]_{(aq)}^{-}$ | VI  | 1.139 |
| $[NpO(OH)_5]_{(aq)}^{-}$              | VI  | 1.178 |
| $cis[NpO_2(OH)_2(H_2O)_2]_{(aq)}$     | VI  | 1.139 |
| $trans[NpO_2(OH)_2(H_2O)_2]_{(aq)}$   | VI  | 1.125 |
| $[NpO_2(OH)_4(H_2O)]_{(aq)}$          | VI  | 1.192 |
| $[Np(OH)_6]_{(aq)}$                   | VI  | 1.147 |
| $[NpO(OH)_3(H_2O)_2]_{(aq)}^{+}$      | VI  | 1.203 |
| $[NpO(OH)_5(H_2O)]_{(aq)}^{+}$        | VI  | 1.134 |
| $[Np(OH)_4(H_2O)_2]_{(aq)}^{+}$       | VI  | 1.148 |

---

## 1.4 Prediction of Raman spectra

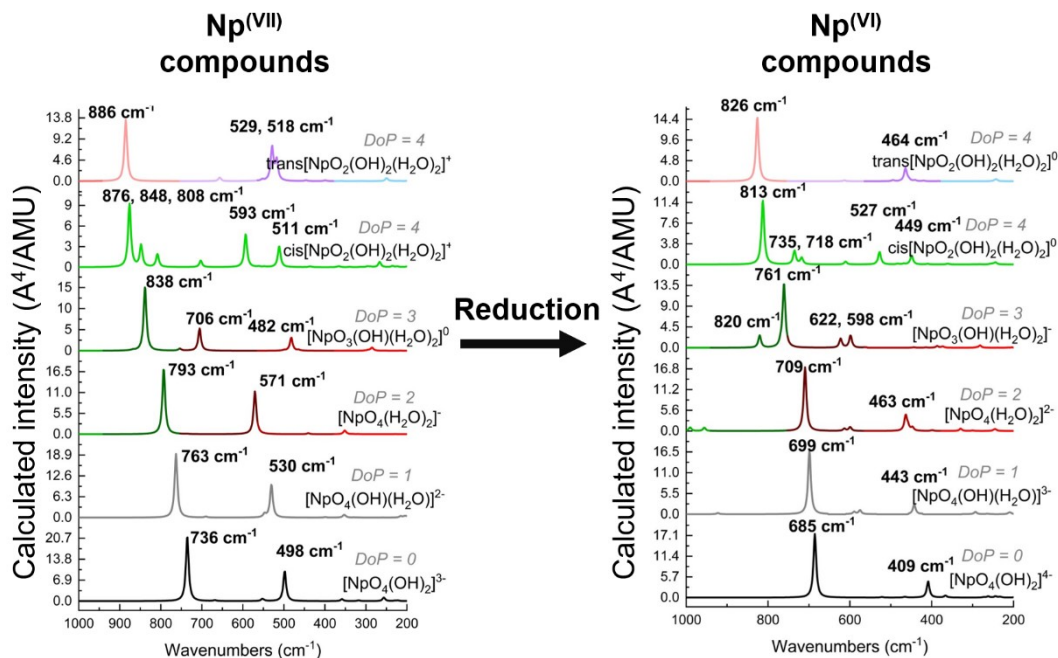

**Figure S2:** Predicted Raman spectra of Np(VII) and corresponding Np(VI) compounds in protonation path 1 and 2. Here DoP stands for Degree of Protonation. The color of each line

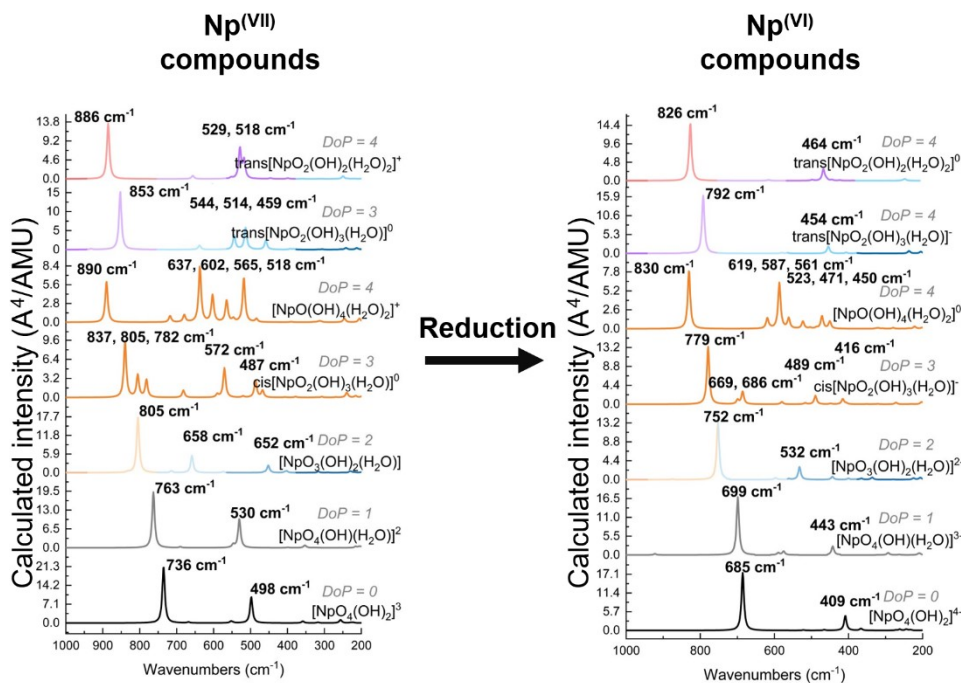

corresponds to the protonation path.

**Figure S3:** Predicted Raman spectra of Np(VII) and corresponding Np(VI) compounds in protonation path 3 and 4. Here DoP stands for Degree of Protonation. The color of each line corresponds to the protonation path.

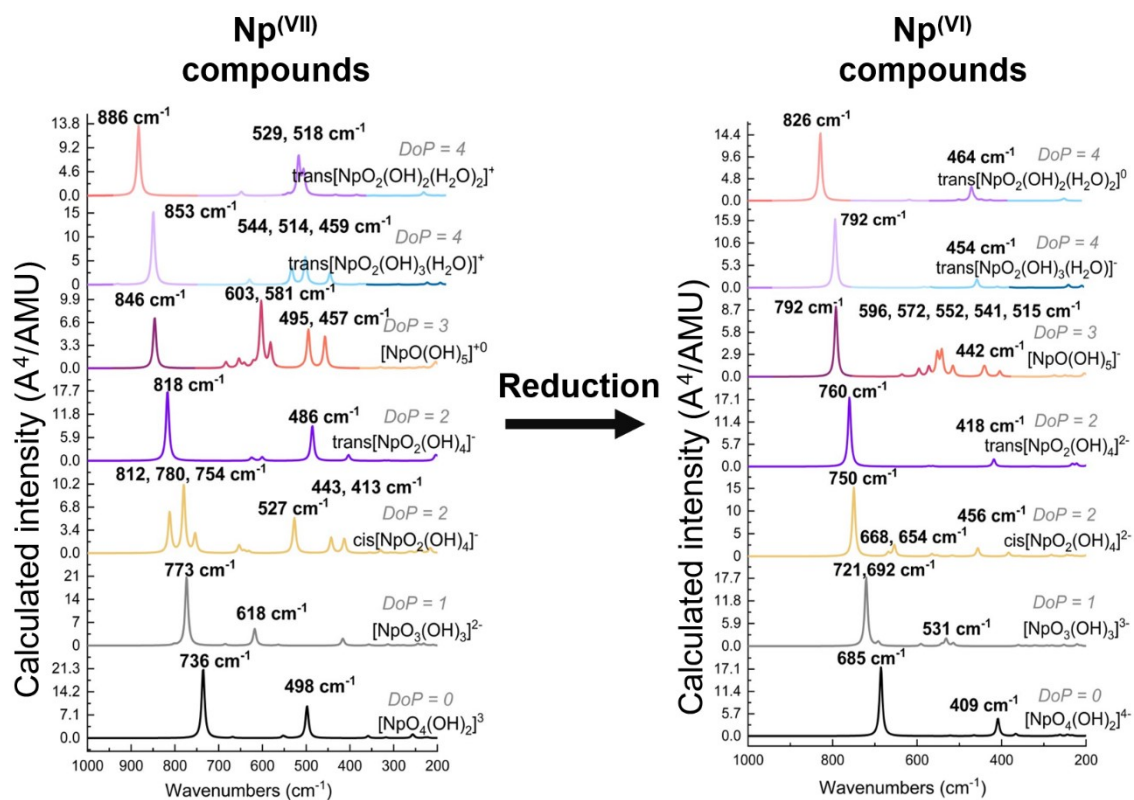

**Figure S4:** Predicted Raman spectra of Np(VII) and corresponding Np(VI) compounds in protonation path 5 and 6. Here DoP stands for Degree of Protonation. The color of each line corresponds to the protonation path.

## 1.5 Benchmarking TD-DFT calculations

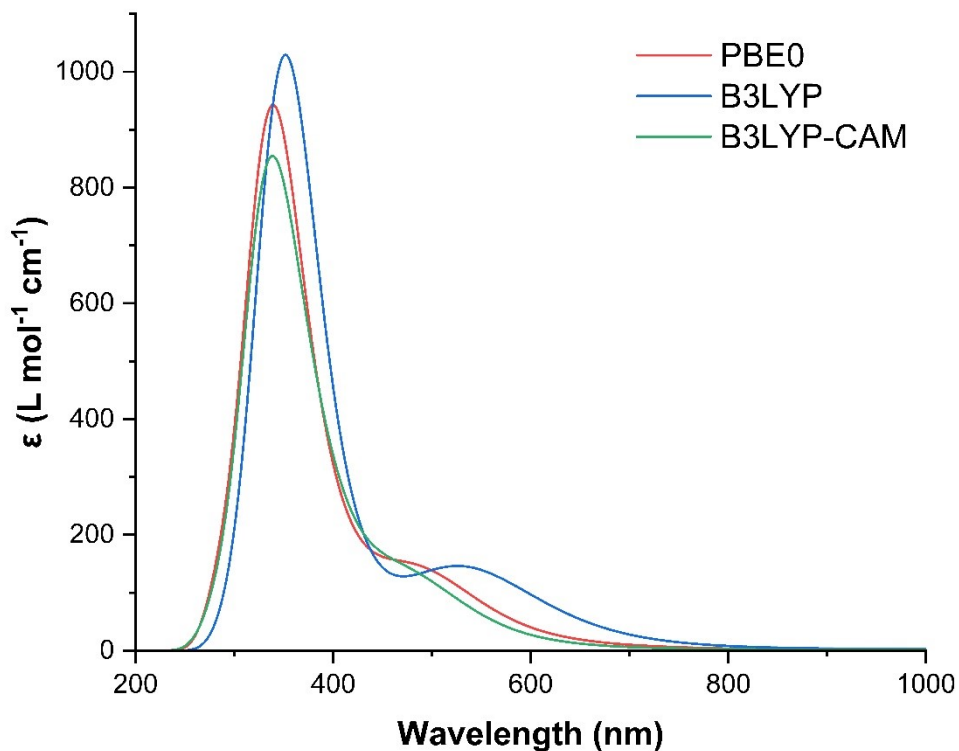

**Figure S5:** Simulated spectra of  $[NpO_4(OH)_2]_{(aq)}^{3-}$  with TD-DFT using different functionals.

## 1.6 Choice of the functional for DFT calculations

In this study, the B3LYP functional was employed for the computational analysis of actinide systems, with a specific focus on Np(V-VII) compounds. The choice of B3LYP is grounded in its extensive and successful application within the computational chemistry community, particularly for actinide elements. B3LYP has demonstrated consistent accuracy in predicting geometries, electronic structures, bonding characteristics, vibrational spectroscopy, and excited state properties, making it a reliable choice for our investigations.

Previous work within our research group has shown that the B3LYP functional provides excellent agreement with experimental data, particularly when predicting the geometry and Raman features of neptunium compounds across various oxidation states (V-VII). For instance, our studies have confirmed that B3LYP closely matches experimental values, as evidenced by the accurate reproduction of vibrational frequencies and bond distances in these complex systems.<sup>1-5</sup>

The broader applicability of B3LYP within actinide chemistry is also supported by its widespread use in the field. Kovács *et al.* have conducted a comprehensive review of computational methods in actinide chemistry, highlighting that B3LYP is particularly effective for calculating An=O bond distances, vibrational features, dissociation energies, ionization energies, and electronic spectra.<sup>6</sup> Furthermore, numerous studies have successfully utilized B3LYP in

analyzing reaction mechanisms<sup>7, 8</sup> and vibrational spectroscopy<sup>9, 10</sup> of actinide complexes, further validating its robustness.

In the context of TDDFT calculations, which are essential for exploring excited-state properties, Tecmer *et al.* have evaluated the performance of various functionals and concluded that B3LYP is suitable for (semi)quantitative or qualitative analyses.<sup>11</sup> While CAM-B3LYP has been shown to yield optimal results for predicting the UV-Vis spectra of  $\text{UO}_2^{2+}$ ,<sup>11</sup> our benchmarking study revealed that B3LYP provided the best agreement with experimental observations when simulating the spectra of  $[\text{NpO}_4(\text{OH})_2]^{3-}$ . Specifically, B3LYP most accurately reproduced the wavelength corresponding to peak maxima, the separation between spectral features, and the overall shape of the spectrum (Figures S5 and S6). This outcome strongly supports our selection of B3LYP for TDDFT calculations in this study. The reliability of B3LYP in predicting electric and magnetic properties of actinide systems is further verified by previous research by Su *et al.*,<sup>12</sup> Gendron *et al.*,<sup>13</sup> Heaven *et al.*,<sup>14</sup> and Hu *et al.*,<sup>15</sup> who have demonstrated its effectiveness across a range of actinide compounds. These findings collectively affirm the robustness and versatility of B3LYP as a functional in the computational study of actinide chemistry.

## 2. Experimental evidence of Np(VII) protonation

### 2.1 Titration studies of Np(VII) solutions

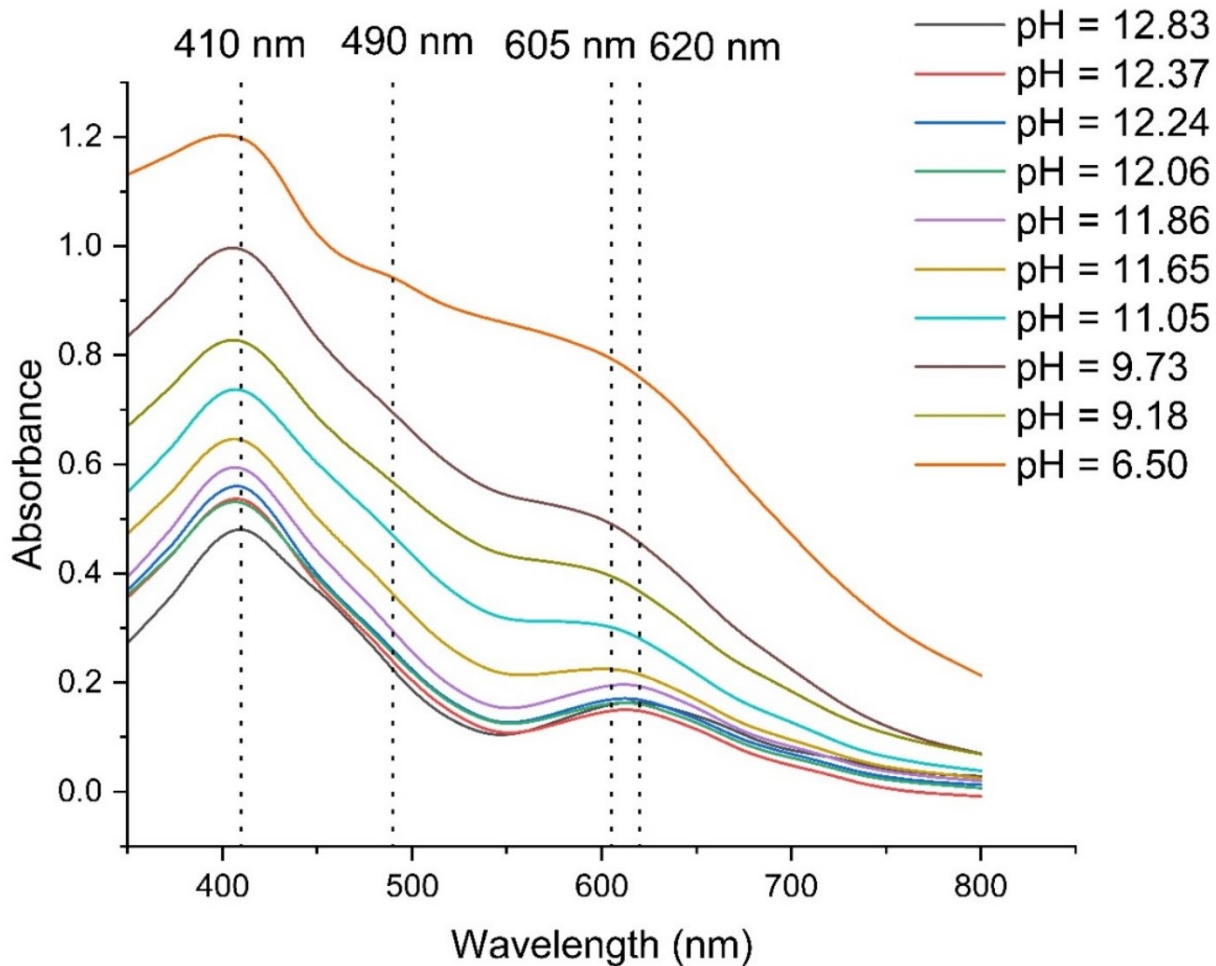

**Figure S6:** Stacked UV-Vis spectra at each pH value of the titrations. Here 410 nm and 620 nm correspond to the typical absorption bands of  $[NpO_4(OH)_2]_{(aq)}^{3-}$ .

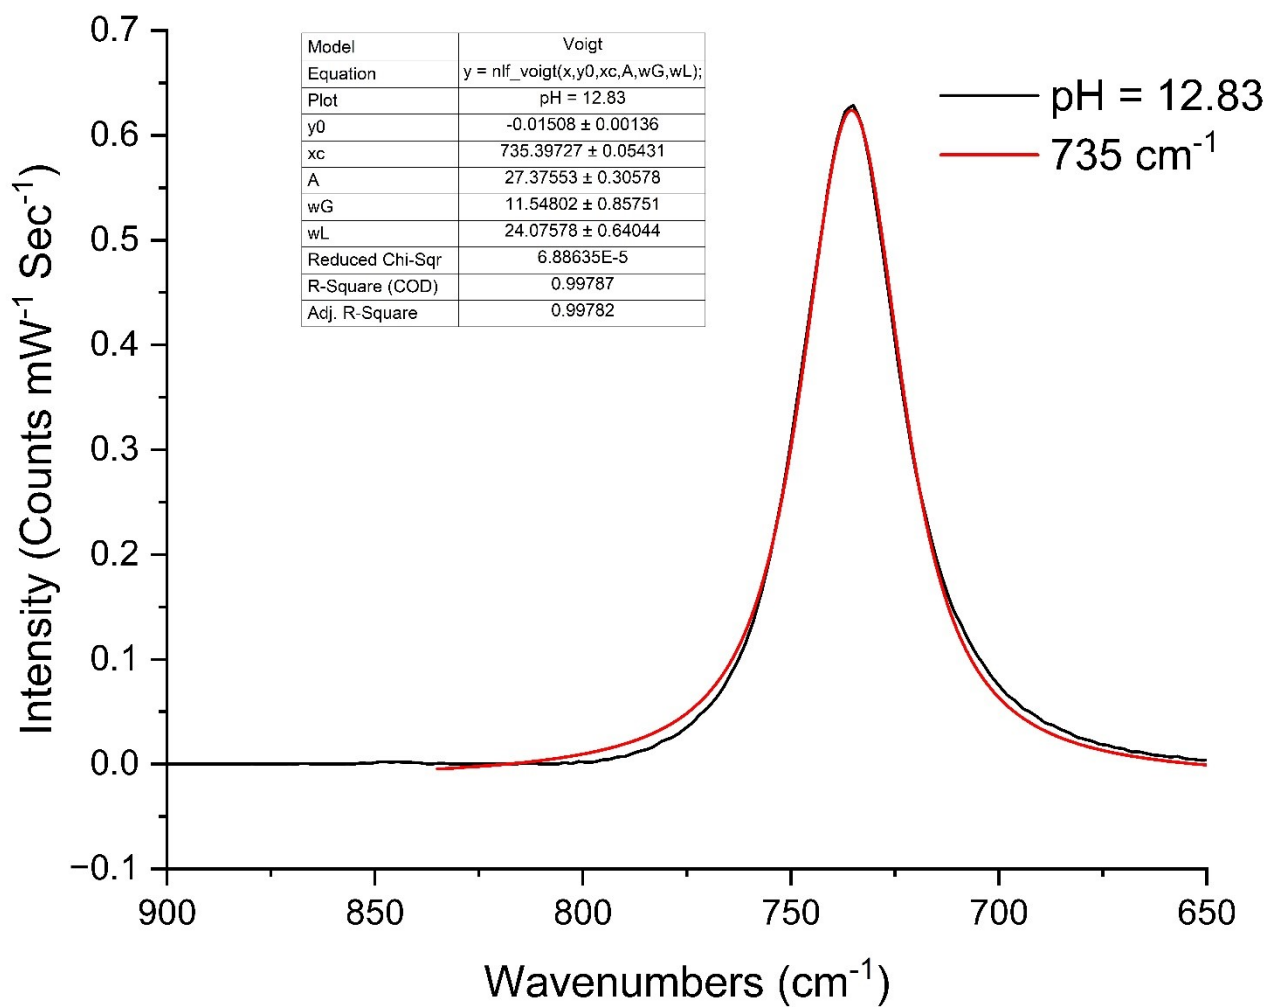

**Figure S7:** Solution Raman spectra of pH 12.83 solution with fitting parameters in the spectral window of 900-650  $\text{cm}^{-1}$ .

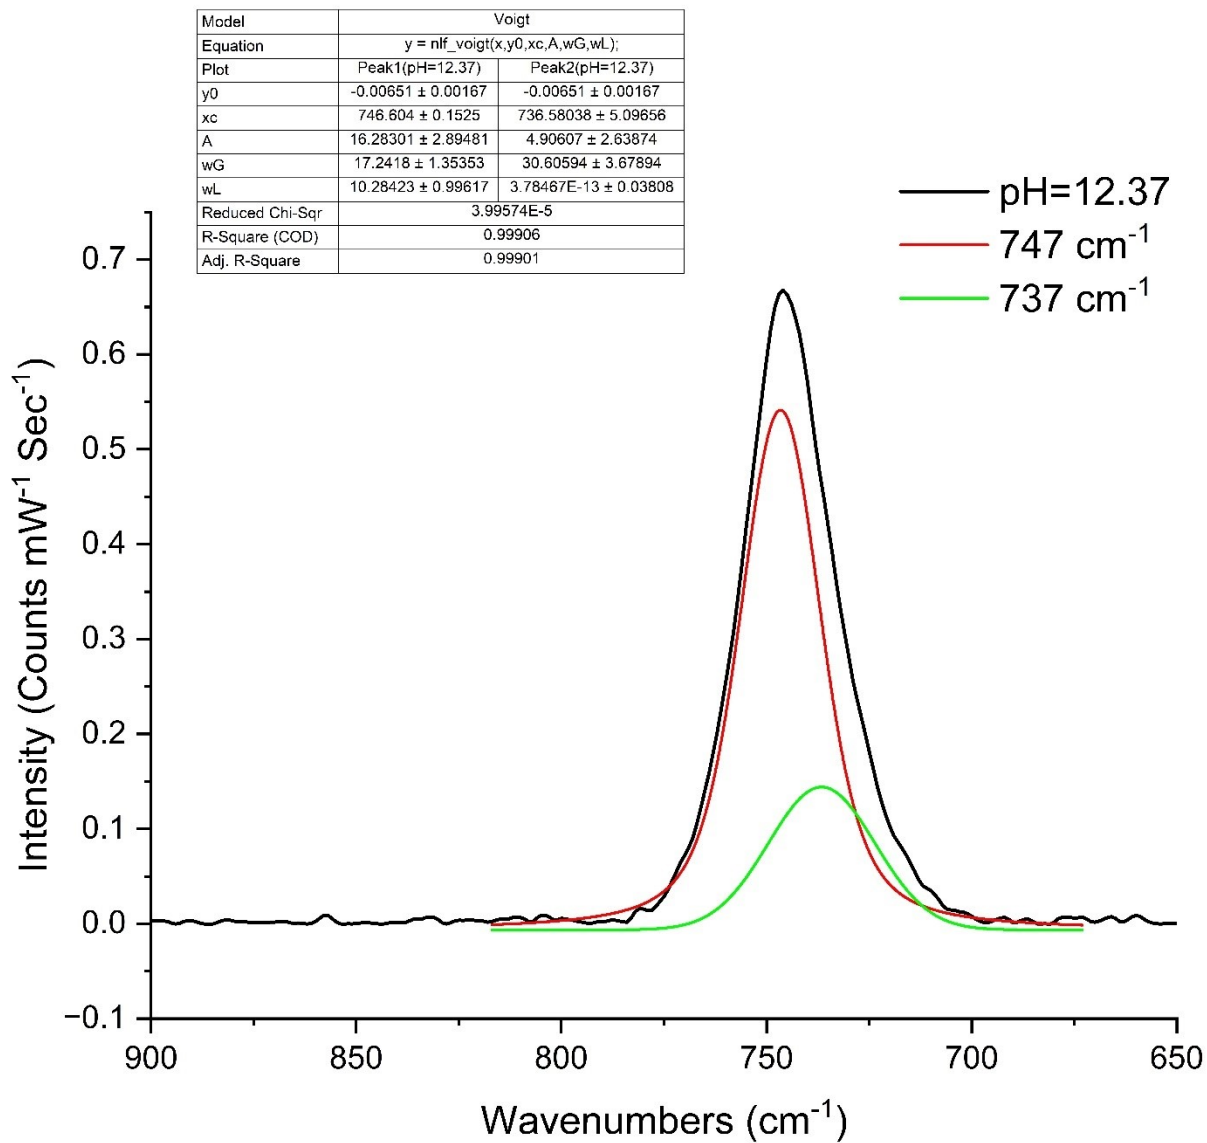

**Figure S8:** Solution Raman spectra of pH 12.37 solution with fitting parameters in the spectral window of 900-650  $\text{cm}^{-1}$ .



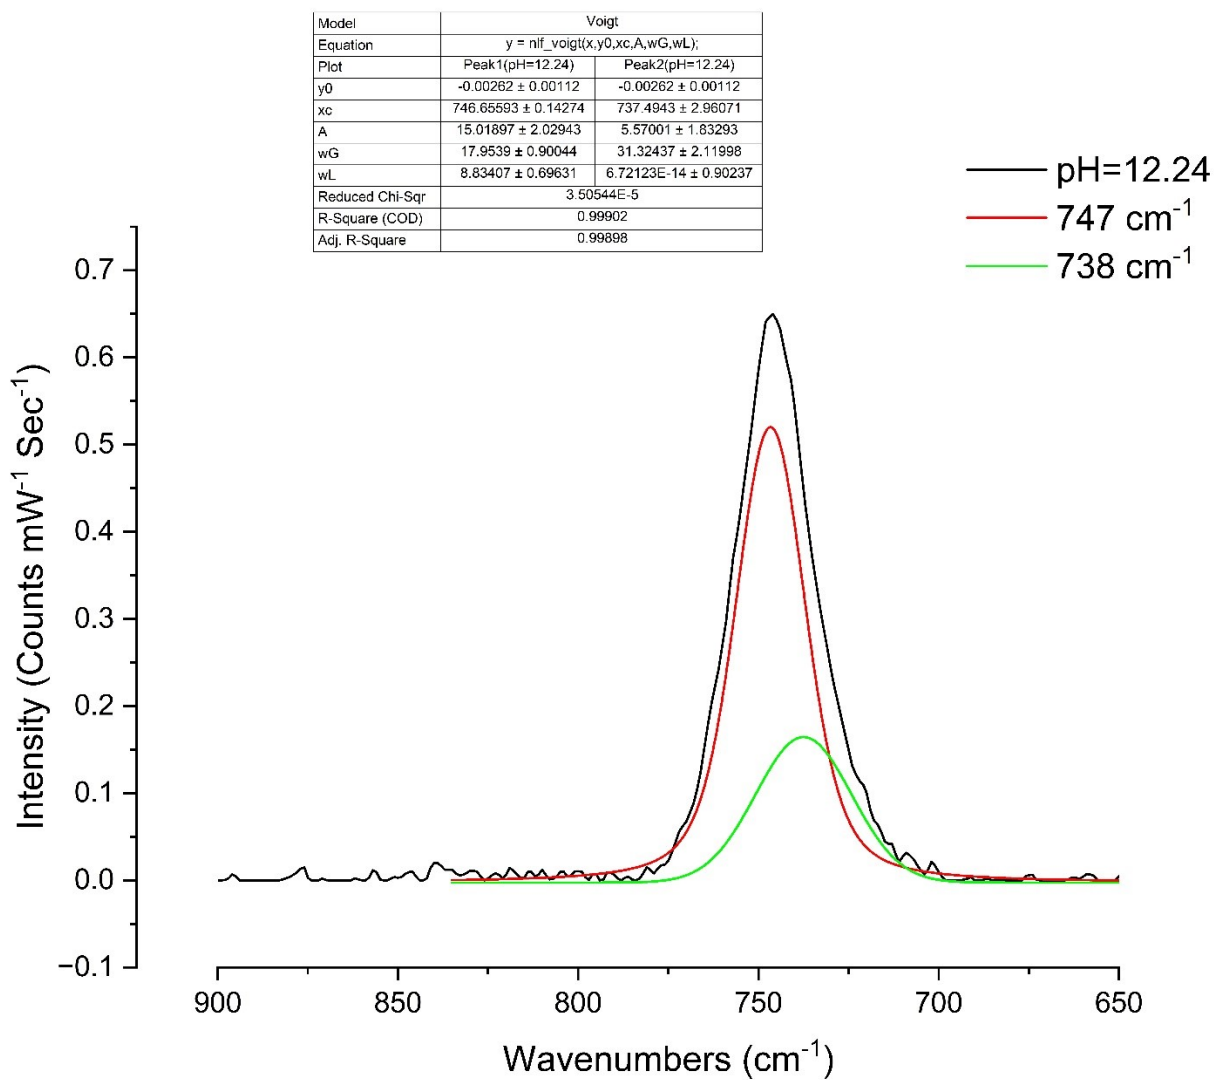

**Figure S9:** Solution Raman spectra of pH 12.24 solution with fitting parameters in the spectral window of 900-650  $\text{cm}^{-1}$ .

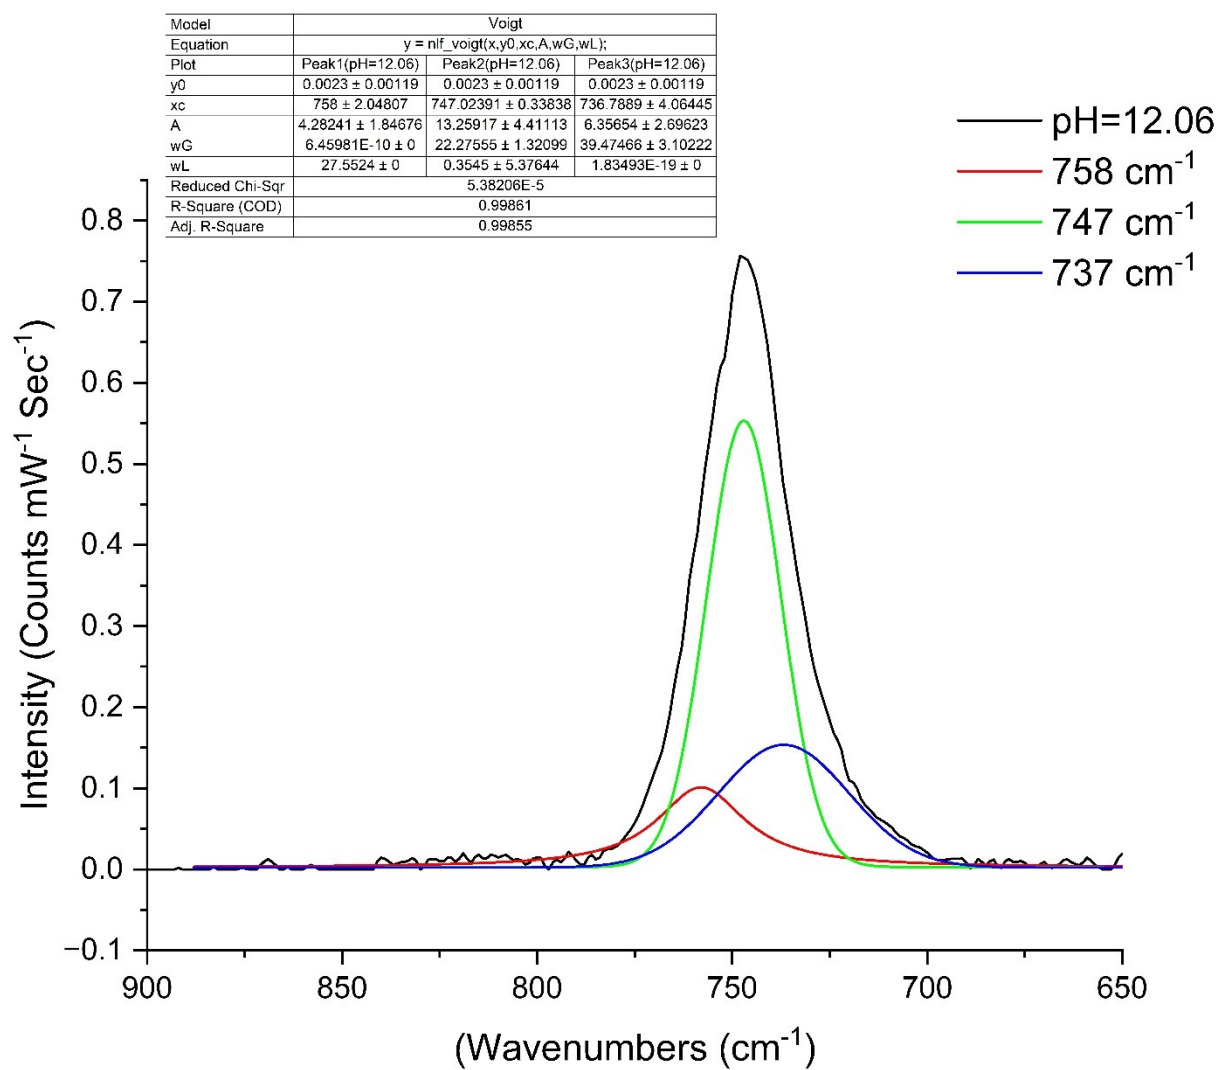

**Figure S10:** Solution Raman spectra of pH 12.06 solution with fitting parameters in the spectral window of 900-650  $\text{cm}^{-1}$ .

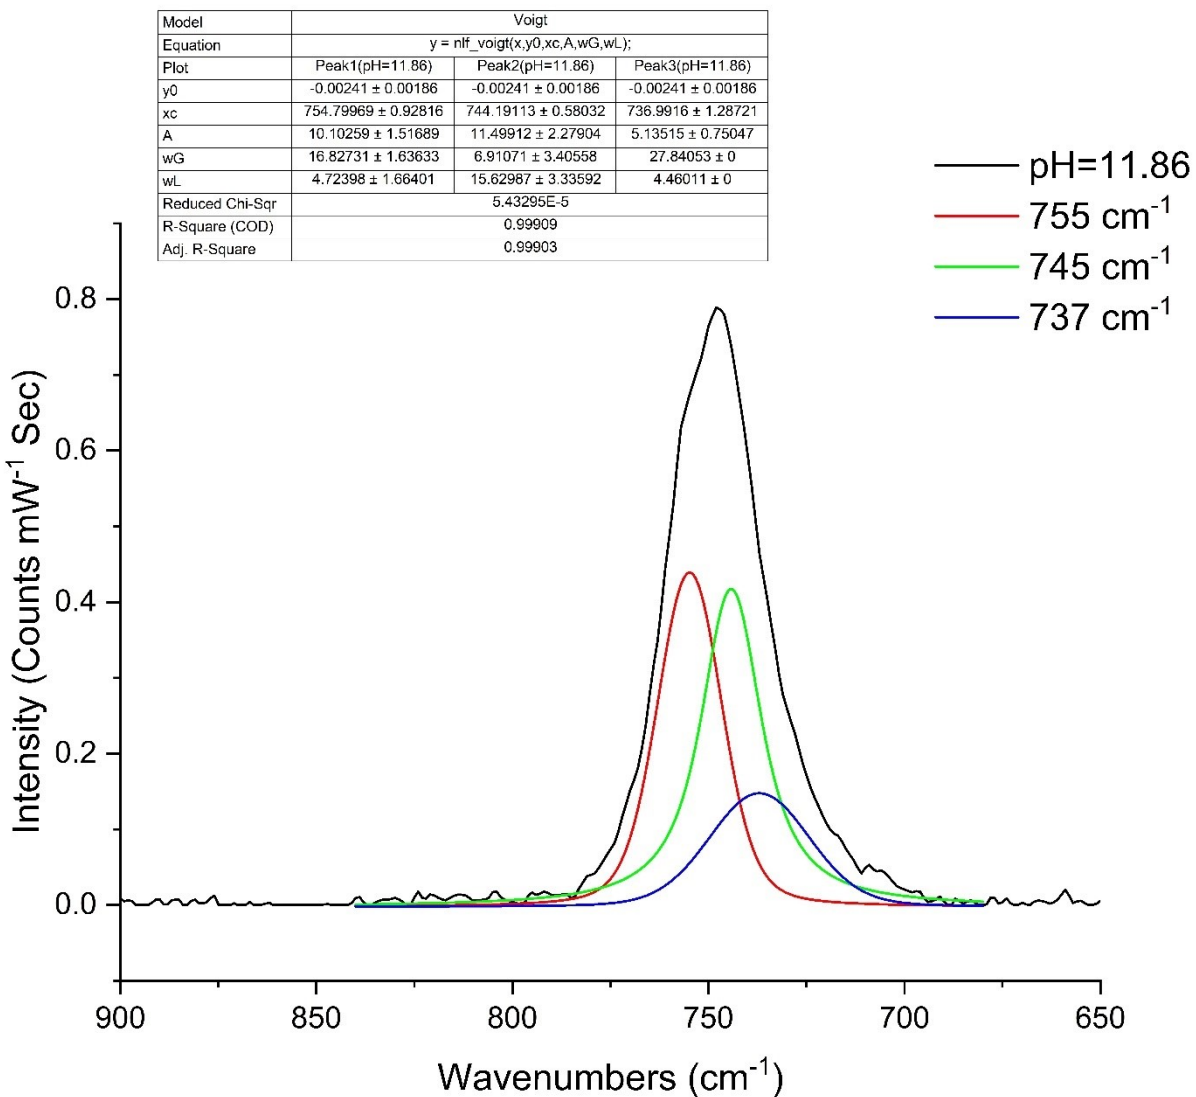

**Figure S11:** Solution Raman spectra of pH 11.86 solution with fitting parameters in the spectral window of 900-650 cm<sup>-1</sup>.

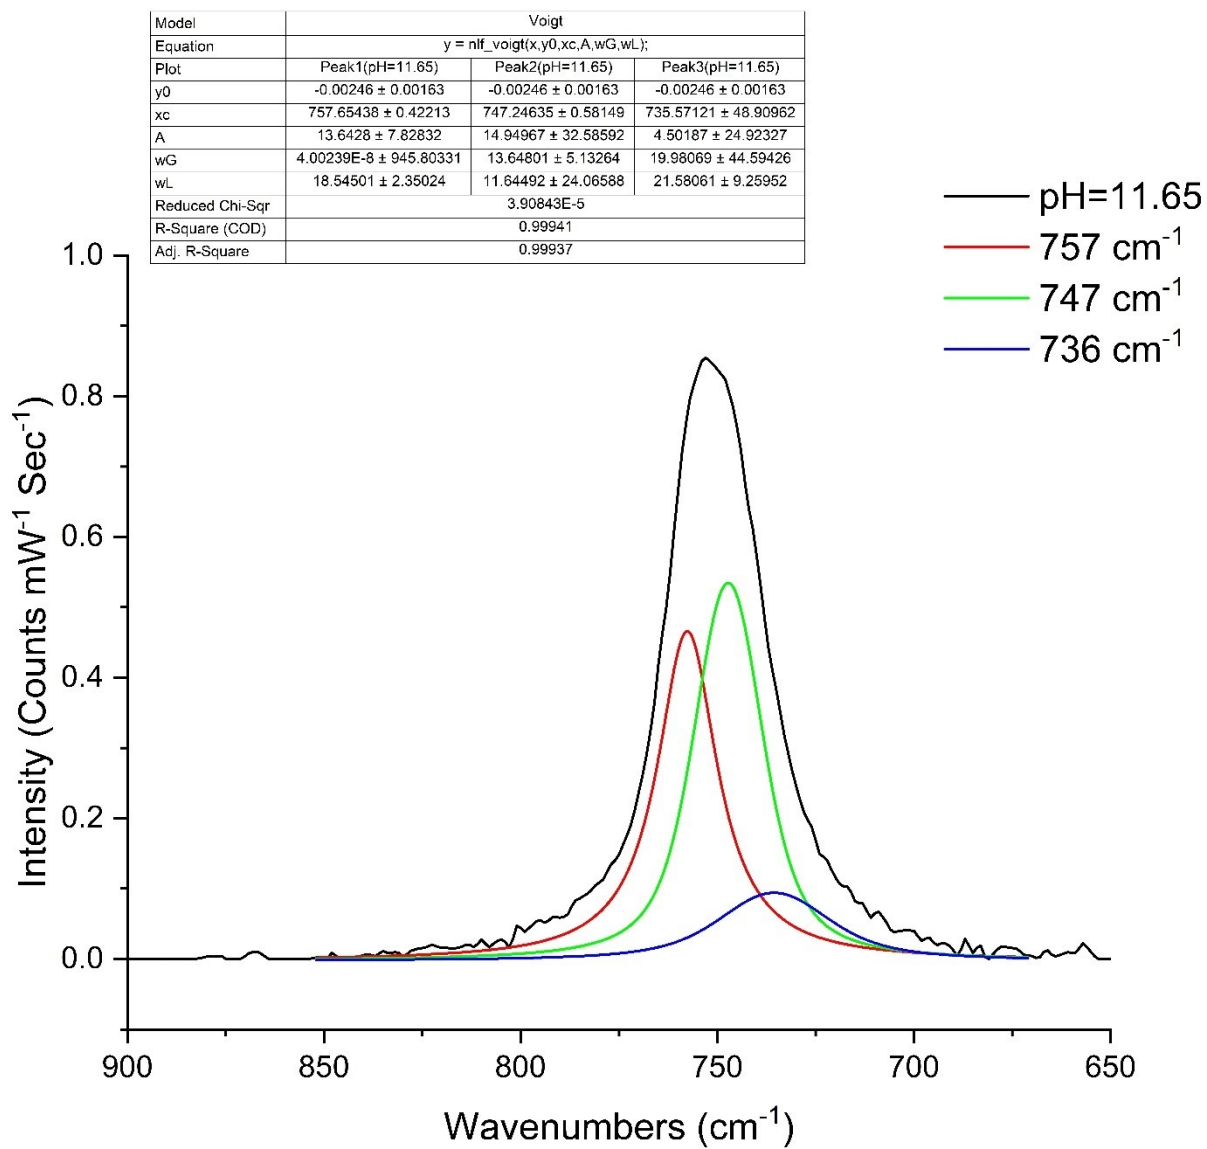

**Figure S12:** Solution Raman spectra of pH 11.65 solution with fitting parameters in the spectral window of 900-650  $\text{cm}^{-1}$ .

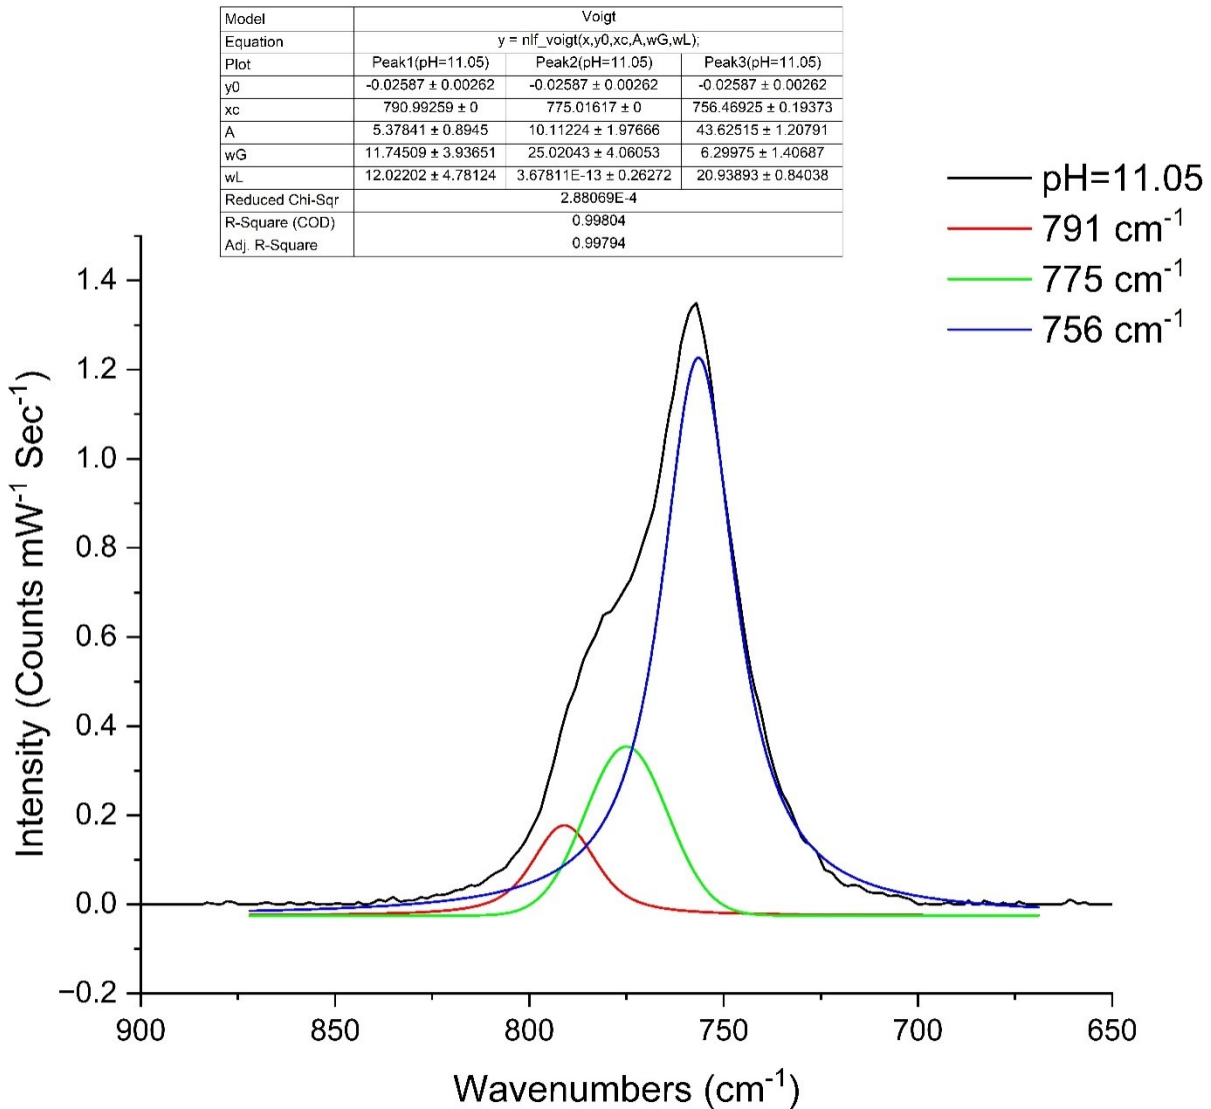

**Figure S13:** Solution Raman spectra of pH 11.05 solution with fitting parameters in the spectral window of 900-650  $\text{cm}^{-1}$ .

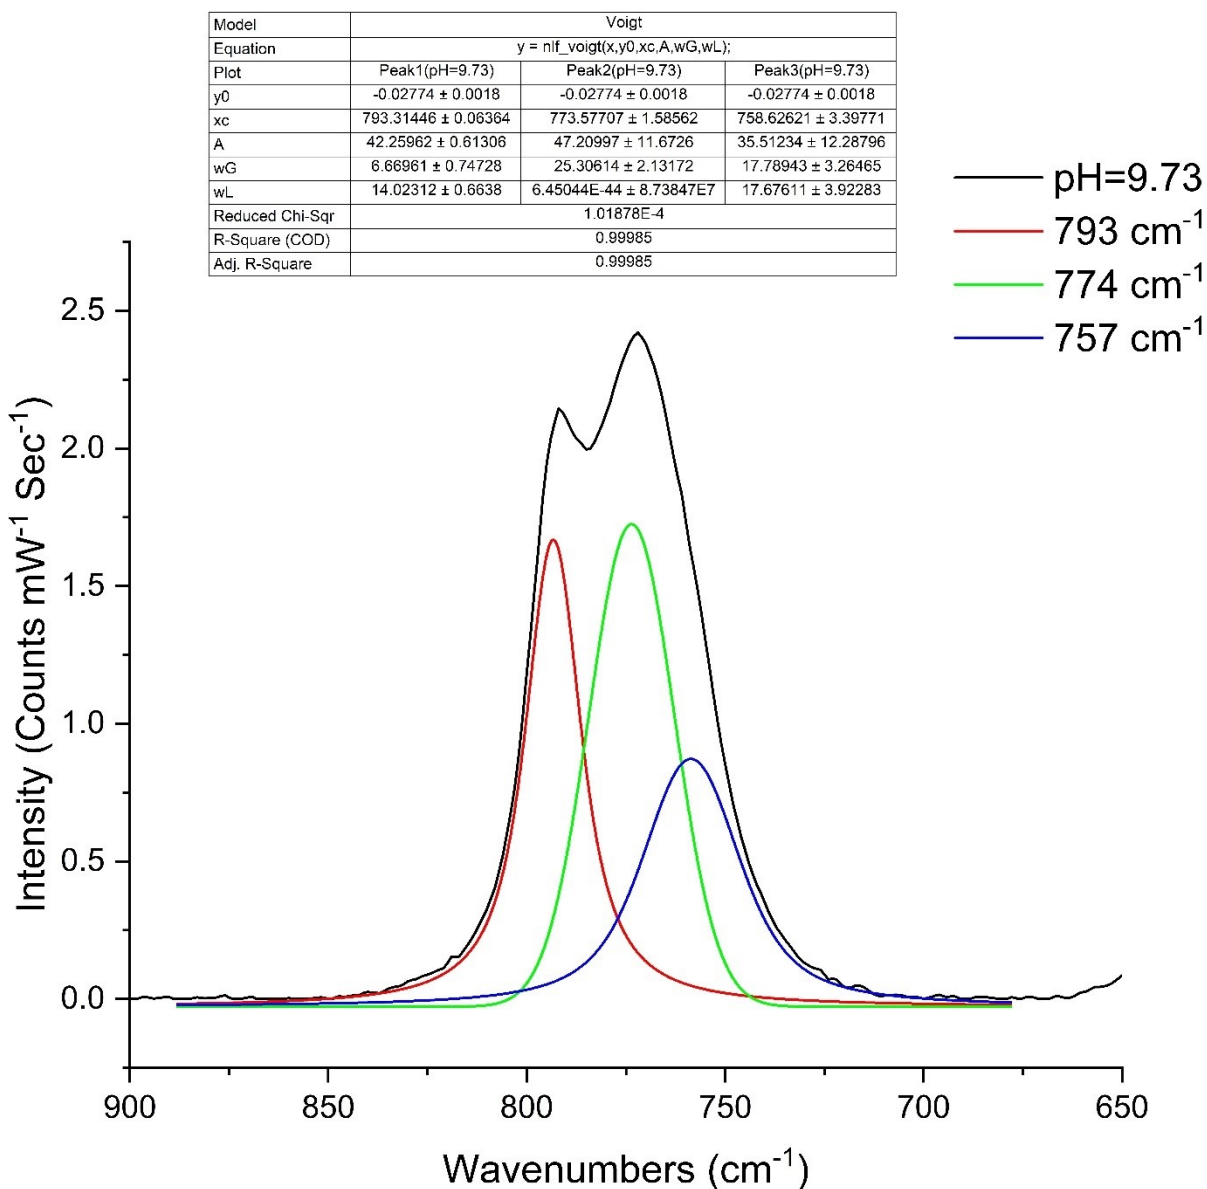

**Figure S14:** Solution Raman spectra of pH 9.73 solution with fitting parameters in the spectral window of 900-650 cm<sup>-1</sup>.

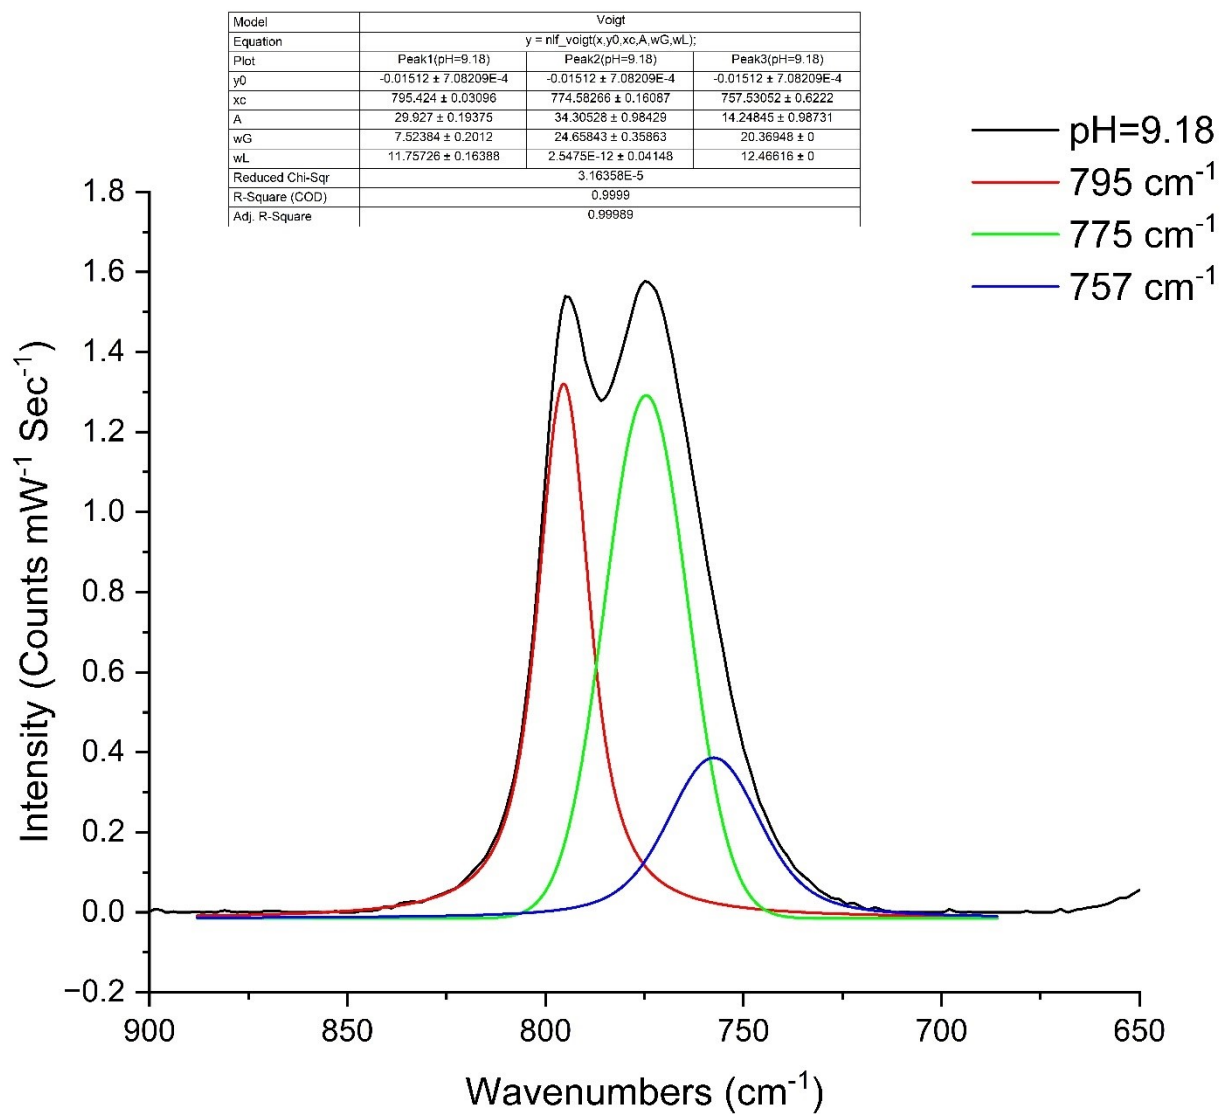

**Figure S15:** Solution Raman spectra of pH 9.18 solution with fitting parameters in the spectral window of 900-650 cm<sup>-1</sup>.

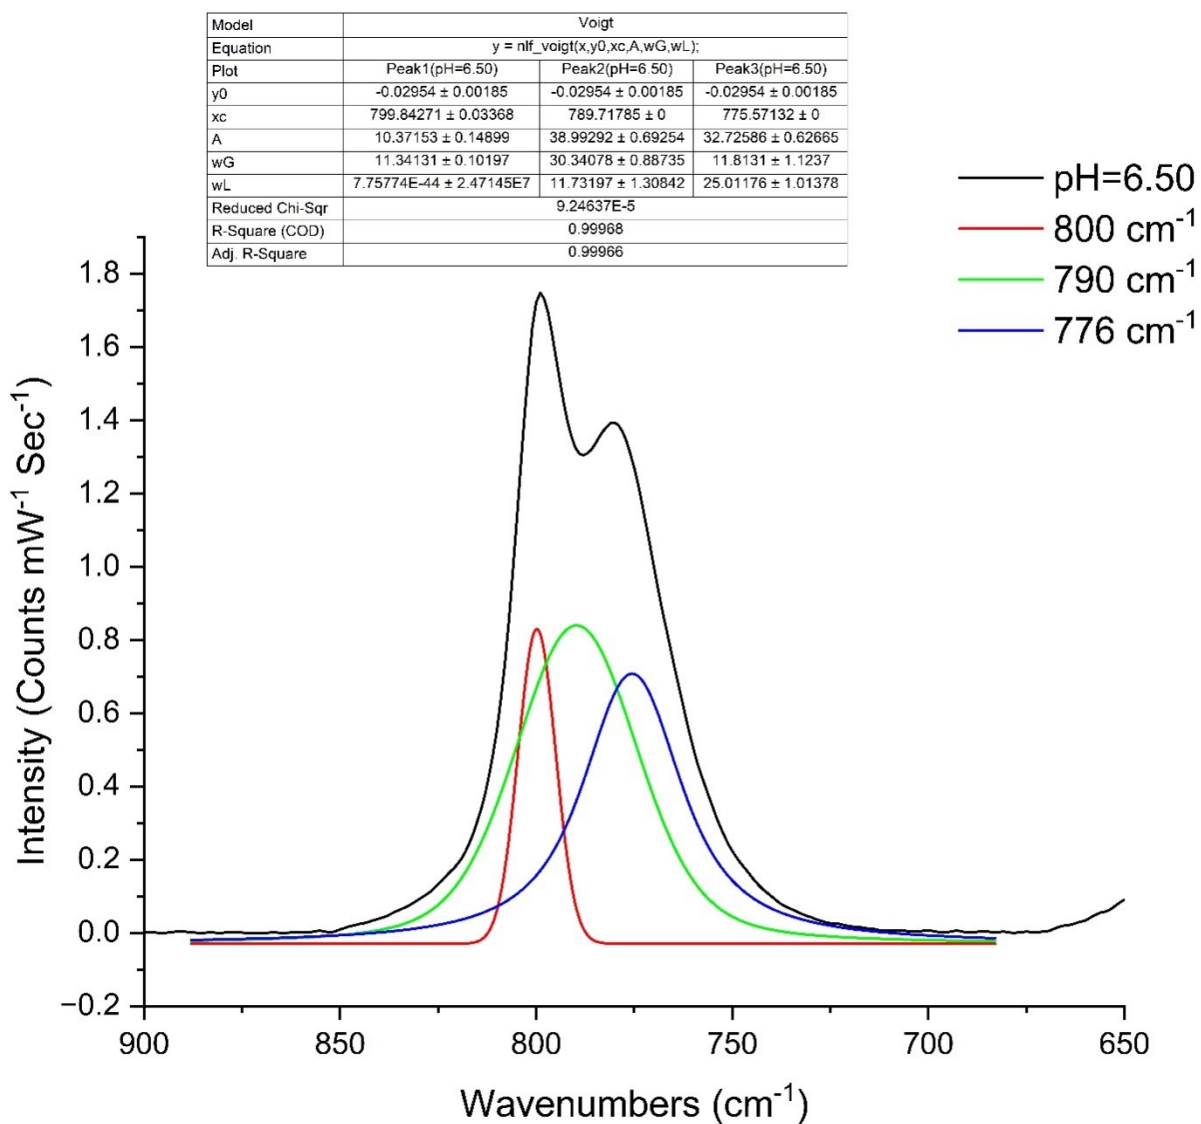

**Figure S16:** Solution Raman spectra of pH 6.50 solution with fitting parameters in the spectral window of 900-650  $\text{cm}^{-1}$ .



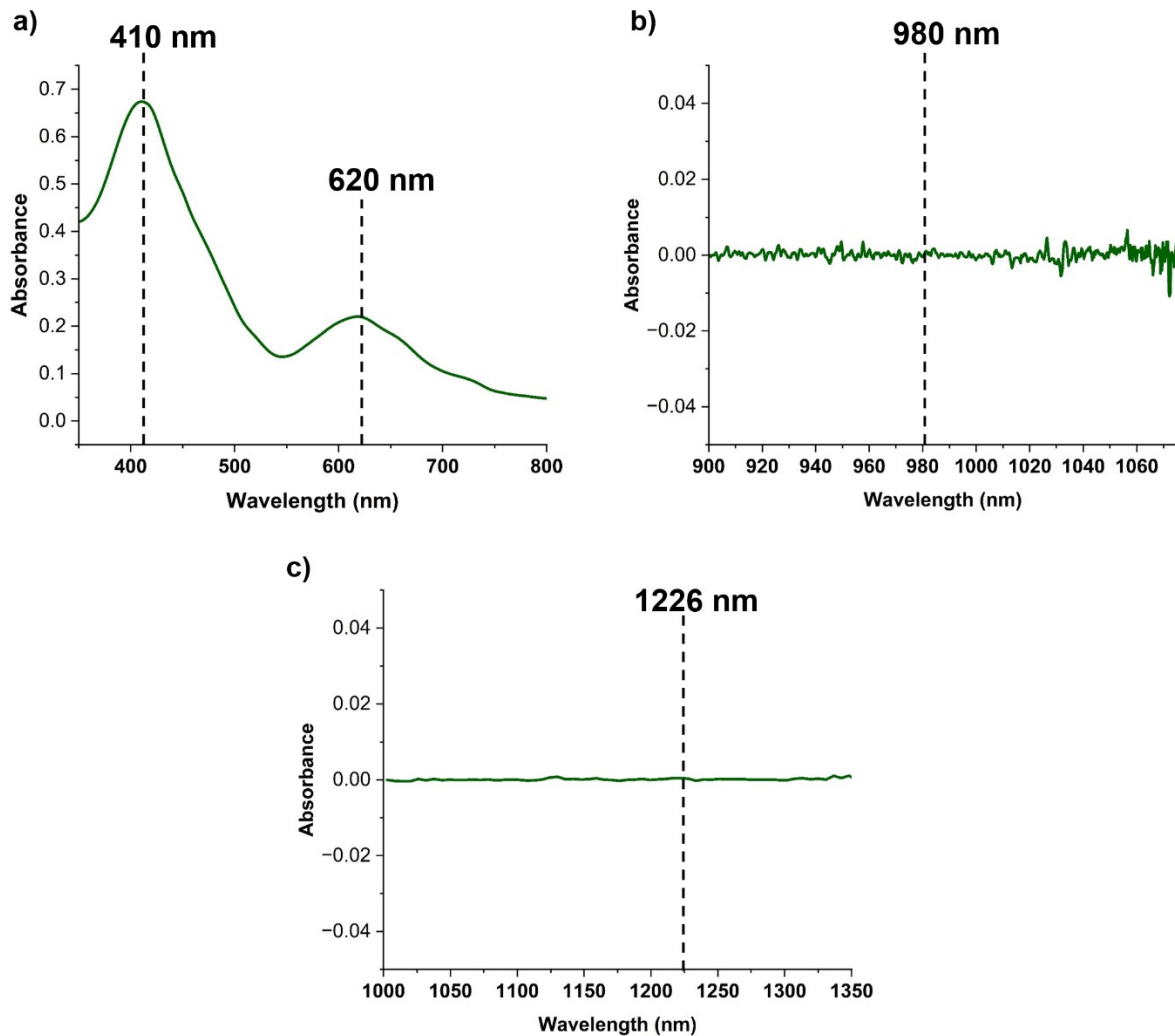

**Figure S17:** Optical spectroscopy of the solution formed by dissolving the precipitate from pH 6.50 solution in 1M LiOH. Here a), b), and c) are UV-Vis, Vis and NIR spectra respectively.

## 2.2 Protonation of Np(VII) Solids by Acid Vapor Diffusion

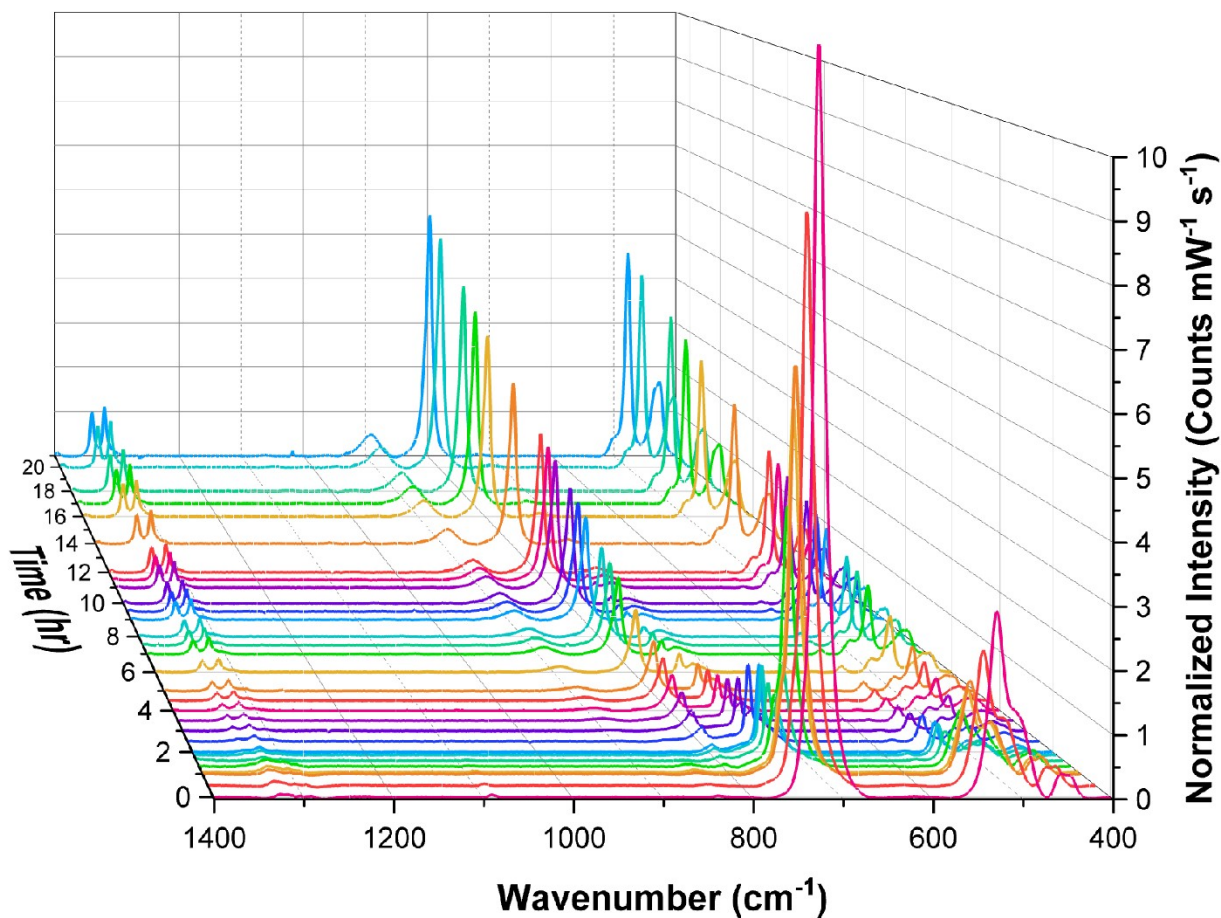

**Figure S18:** Overlay of solid-state Raman spectra collected on a single sample of  $[(\text{Co}(\text{NH}_3)_6)(\text{NpO}_4(\text{OH})_2)] \cdot (\text{H}_2\text{O})_n$  ( $n = 2-4$ ) in the spectral window 1400-400  $\text{cm}^{-1}$ . Spectra were collected periodically over the course of 21 hrs while the sample was continuously exposed to acidic vapor.

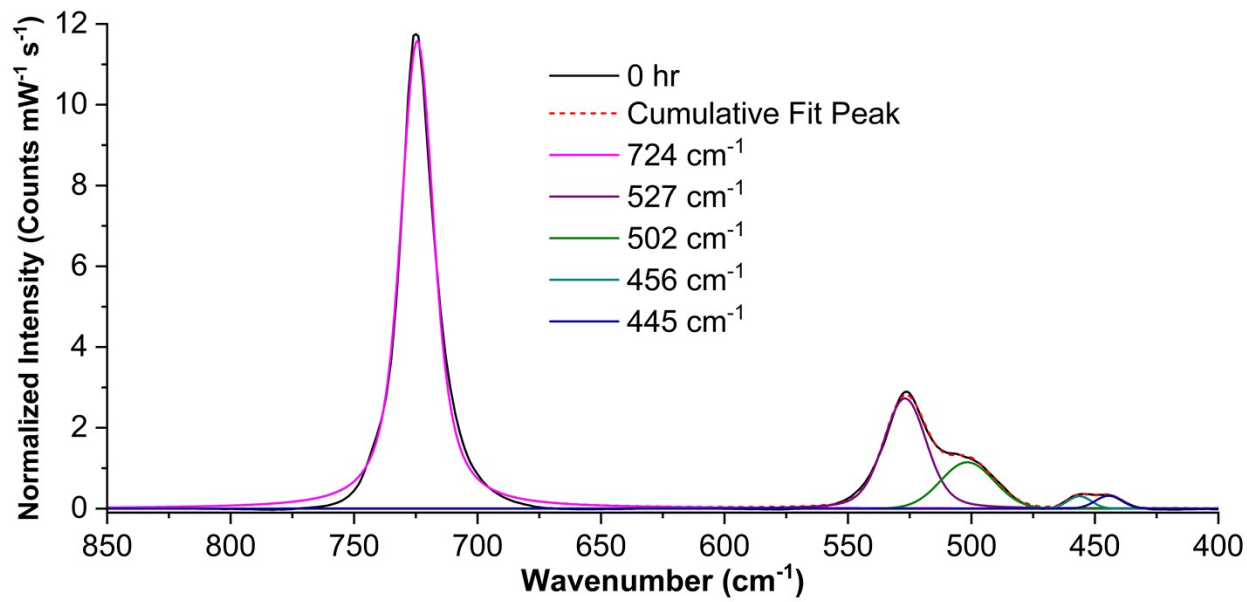

|         | y0    |                | xc    |                | A     |                | wG    |                | wL        |                | FWHM  |                | Statistics      |               |
|---------|-------|----------------|-------|----------------|-------|----------------|-------|----------------|-----------|----------------|-------|----------------|-----------------|---------------|
|         | Value | Standard Error | Value     | Standard Error | Value | Standard Error | Reduced Chi-Sqr | Adj. R-Square |
| Peak1() | 0     | 0              | 724.4 | 0.03184        | 257.4 | 1.467          | 9.285 | 0.282          | 10.49     | 0.2412         | 16.1  | 0.1099         | 0.01477         | 0.9958        |
| Peak2() | 0     | 0              | 526.9 | 0.3234         | 67.01 | 3.023          | 17.25 | 1.385          | 5.828     | 1.682          | 20.58 | 0.66           |                 |               |
| Peak3() | 0     | 0              | 501.7 | 0.8431         | 30.88 | 2.495          | 25.28 | 1.874          | 3.595E-24 | --             | 25.28 | 1.874          |                 |               |
| Peak4() | 0     | 0              | 456.2 | 3.437          | 3.656 | 3.041          | 11.21 | 10.27          | 3.89E-8   |                | 13.38 | 11.21          | 5.202           |               |
| Peak5() | 0     | 0              | 444.5 | 3.932          | 4.275 | 2.831          | 12.65 | 6.024          | 1E-18     |                | 0     | 12.65          | 6.024           |               |

Figure S19: Solid-state Raman spectra with fitting parameters and statistics of neat

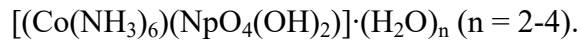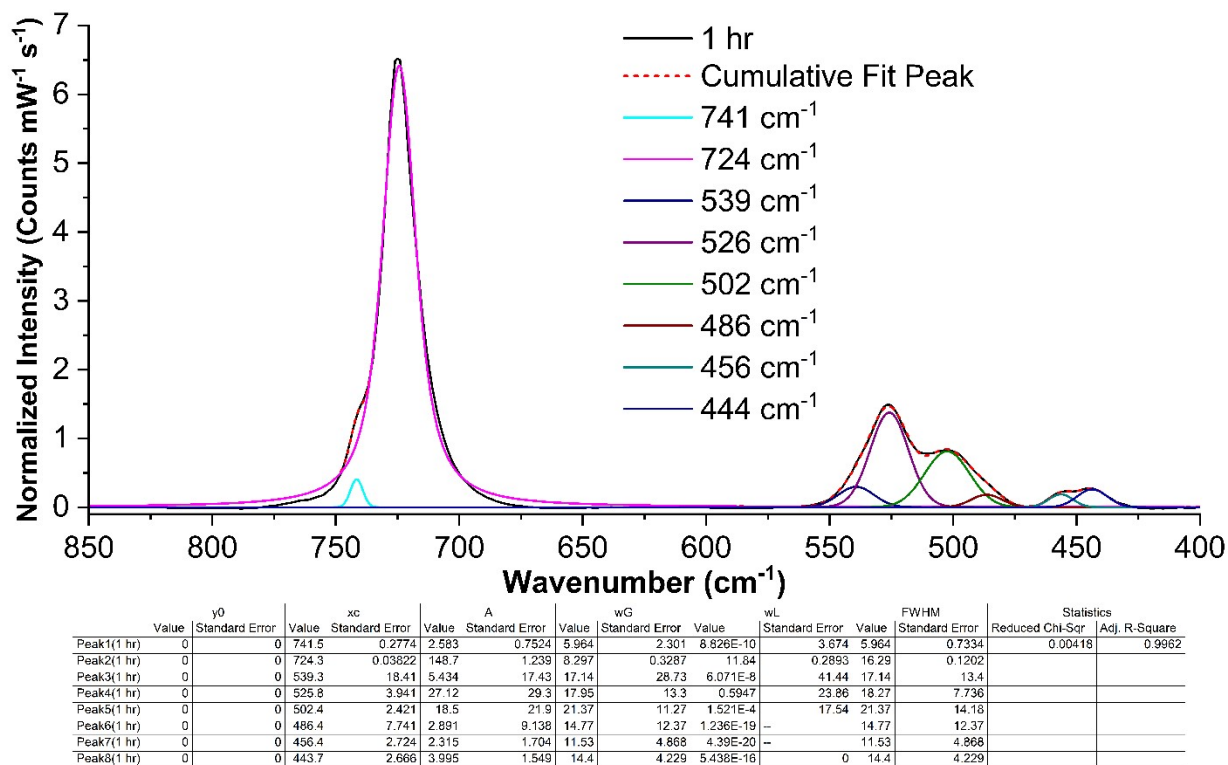

**Figure S20:** Solid-state Raman spectra with fitting parameters and statistics of  $[(\text{Co}(\text{NH}_3)_6)(\text{NpO}_4(\text{OH})_2)] \cdot (\text{H}_2\text{O})_n$  ( $n = 2-4$ ) after 1 hour of exposure to acidic vapor.

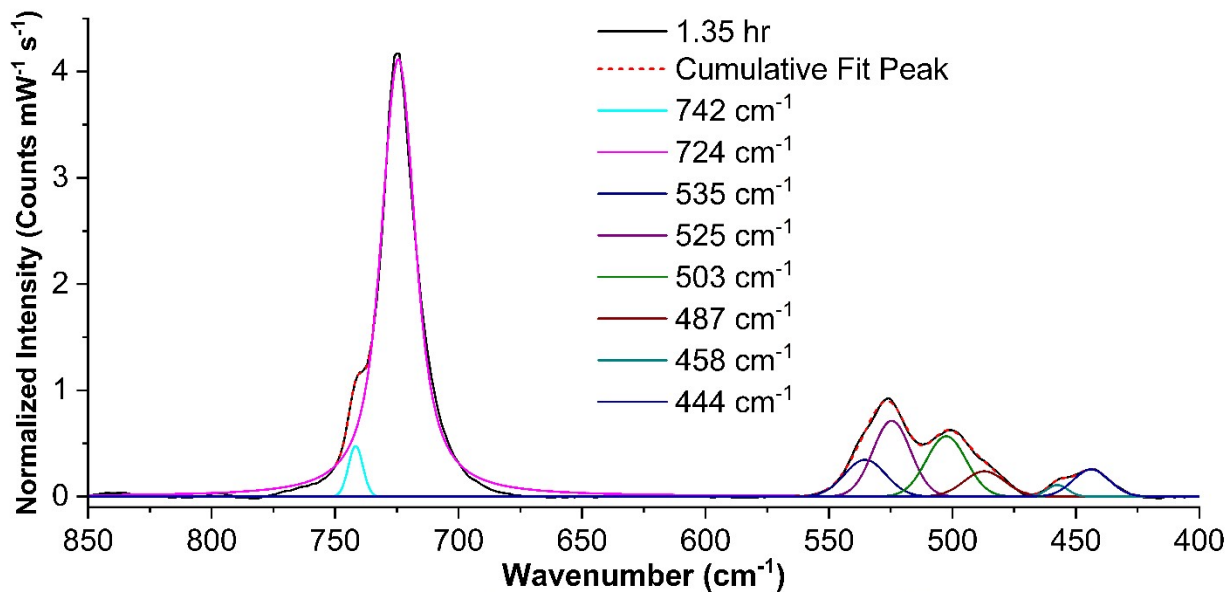

|                | y0    |                | xc    |                | A     |                | wG    |                | wL        |                | FWHM  |                | Statistics      |               |
|----------------|-------|----------------|-------|----------------|-------|----------------|-------|----------------|-----------|----------------|-------|----------------|-----------------|---------------|
|                | Value | Standard Error | Value     | Standard Error | Value | Standard Error | Reduced Chi-Sqr | Adj. R-Square |
| Peak1(1.35 hr) | 0     |                | 741.7 | 0.1567         | 3.495 | 0.5187         | 6.888 | 1.299          | 1.177E-9  | 2.11           | 6.888 | 0.4088         | 0.00152         | 0.9967        |
| Peak2(1.35 hr) | 0     |                | 724.4 | 0.03785        | 96.92 | 0.7876         | 8.057 | 0.3209         | 12.26     | 0.2759         | 16.43 | 0.1169         |                 |               |
| Peak3(1.35 hr) | 0     |                | 535.4 | 39.21          | 7.222 | 39.05          | 19.56 | 35.69          | 3.634E-10 | 28.06          | 19.56 | 35.69          |                 |               |
| Peak4(1.35 hr) | 0     |                | 524.6 | 12.83          | 13.66 | 39.6           | 17.98 | 19.49          | 0.00418   | 28.63          | 17.99 | 10.39          |                 |               |
| Peak5(1.35 hr) | 0     |                | 502.5 | 3.708          | 11.49 | 9.731          | 19.02 | 8.604          | 2.333E-20 | --             | 19.02 | 8.604          |                 |               |
| Peak6(1.35 hr) | 0     |                | 487.1 | 10.79          | 4.907 | 7.825          | 19.38 | 9.636          | 6.017E-29 | --             | 19.38 | 9.636          |                 |               |
| Peak7(1.35 hr) | 0     |                | 457.5 | 1.47           | 1.153 | 0.6359         | 9.898 | 3.184          | 1.776E-13 | 0.3887         | 9.898 | 3.184          |                 |               |
| Peak8(1.35 hr) | 0     |                | 443.8 | 1.184          | 4.685 | 0.6917         | 17.23 | 2.393          | 1E-18     | 0              | 17.23 | 2.393          |                 |               |

**Figure S21:** Solid-state Raman spectra with fitting parameters and statistics of  $[(\text{Co}(\text{NH}_3)_6)(\text{NpO}_4(\text{OH})_2)] \cdot (\text{H}_2\text{O})_n$  ( $n = 2-4$ ) after 1.35 hour of exposure to acidic vapor.

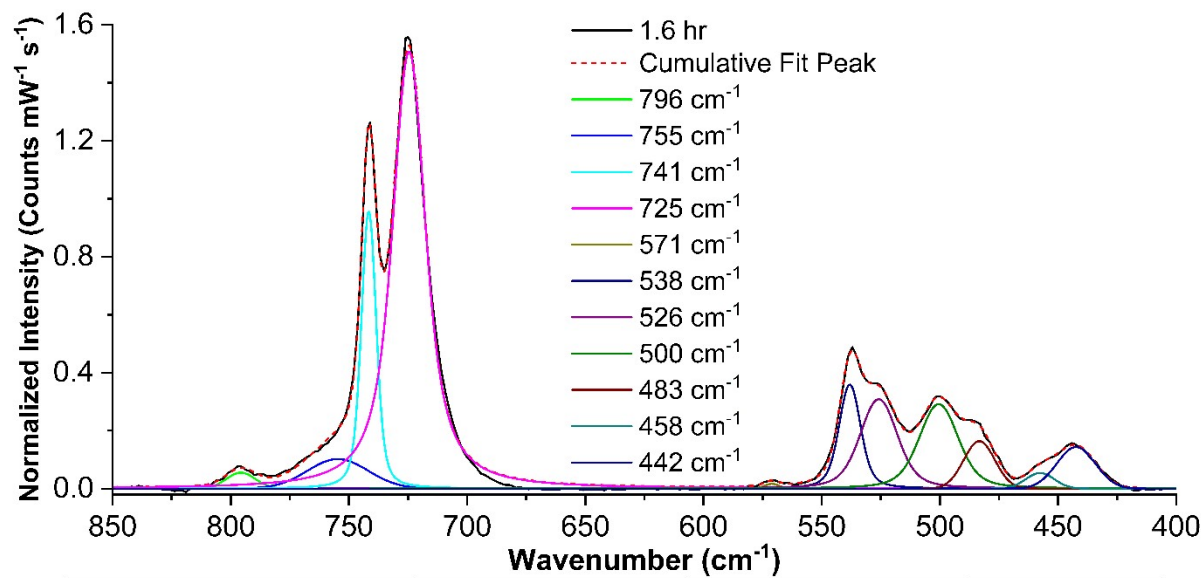

|                | y0    |                | xc    |                | A      |                | wG    |                | wL        |                | FWHM  |                | Statistics      |      |          |
|----------------|-------|----------------|-------|----------------|--------|----------------|-------|----------------|-----------|----------------|-------|----------------|-----------------|------|----------|
|                | Value | Standard Error | Value | Standard Error | Value  | Standard Error | Value | Standard Error | Value     | Standard Error | Value | Standard Error | Reduced Chi-Sqr | Adj. | R-Square |
| Peak1(1.6 hr)  | 0     | 0              | 795.7 | 0.8945         | 0.8555 | 0.6341         | 14.53 | 7.247          | 1.565E-8  | 14.97          | 14.53 | 2.54           | 1.875E-4        |      | 0.9978   |
| Peak2(1.6 hr)  | 0     | 0              | 754.7 | 4.594          | 3.314  | 1.755          | 30    | 21.23          | 0.4908    | 33.62          | 30.26 | 6.949          |                 |      |          |
| Peak3(1.6 hr)  | 0     | 0              | 741.6 | 0.03205        | 8.892  | 1.346          | 5.802 | 0.7155         | 2.863     | 1.384          | 7.483 | 0.2461         |                 |      |          |
| Peak4(1.6 hr)  | 0     | 0              | 724.6 | 0.05299        | 36.01  | 1.01           | 8.396 | 0.5816         | 12.31     | 0.6867         | 16.74 | 0.1592         |                 |      |          |
| Peak5(1.6 hr)  | 0     | 0              | 571.1 | 1.535          | 0.1308 | 0.07052        | 7.314 | 3.964          | 6.529E-22 | 4.769E7        | 7.314 | 3.964          |                 |      |          |
| Peak6(1.6 hr)  | 0     | 0              | 538.1 | 0.2821         | 4.821  | 2.011          | 8.361 | 2.267          | 4.156     | 4.835          | 10.8  | 1.048          |                 |      |          |
| Peak7(1.6 hr)  | 0     | 0              | 525.9 | 0.7462         | 7.134  | 4.924          | 14.6  | 5.642          | 6.962     | 13.57          | 18.68 | 4.513          |                 |      |          |
| Peak8(1.6 hr)  | 0     | 0              | 500.5 | 0.6932         | 7.051  | 4.874          | 15.34 | 7.871          | 7.236     | 18.32          | 19.57 | 4.783          |                 |      |          |
| Peak9(1.6 hr)  | 0     | 0              | 483.3 | 1.041          | 2.707  | 1.348          | 15.51 | 2.545          | 3.403E-22 | --             | 15.51 | 2.545          |                 |      |          |
| Peak10(1.6 hr) | 0     | 0              | 457.6 | 2.847          | 0.8235 | 0.5535         | 14.31 | 4.883          | 2.802E-19 | --             | 14.31 | 4.883          |                 |      |          |
| Peak11(1.6 hr) | 0     | 0              | 442.4 | 1.5            | 2.921  | 0.5111         | 19.09 | 2.278          | 1E-18     | 0              | 19.09 | 2.278          |                 |      |          |

**Figure S22:** Solid-state Raman spectra with fitting parameters and statistics of  $[(\text{Co}(\text{NH}_3)_6)(\text{NpO}_4(\text{OH})_2)] \cdot (\text{H}_2\text{O})_n$  ( $n = 2-4$ ) after 1.6 hour of exposure to acidic vapor.

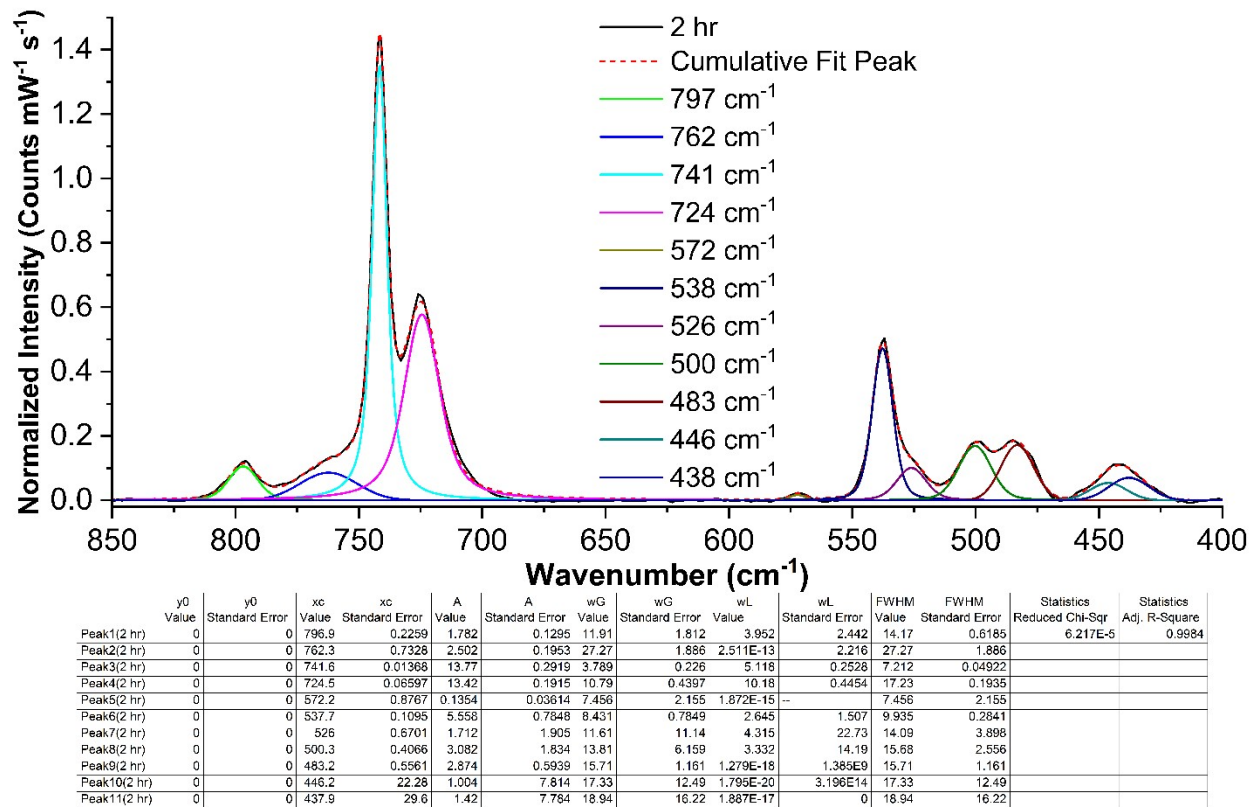

**Figure S23:** Solid-state Raman spectra with fitting parameters and statistics of  $[(\text{Co}(\text{NH}_3)_6)(\text{NpO}_4(\text{OH})_2)] \cdot (\text{H}_2\text{O})_n$  ( $n = 2-4$ ) after 2.0 hour of exposure to acidic vapor.

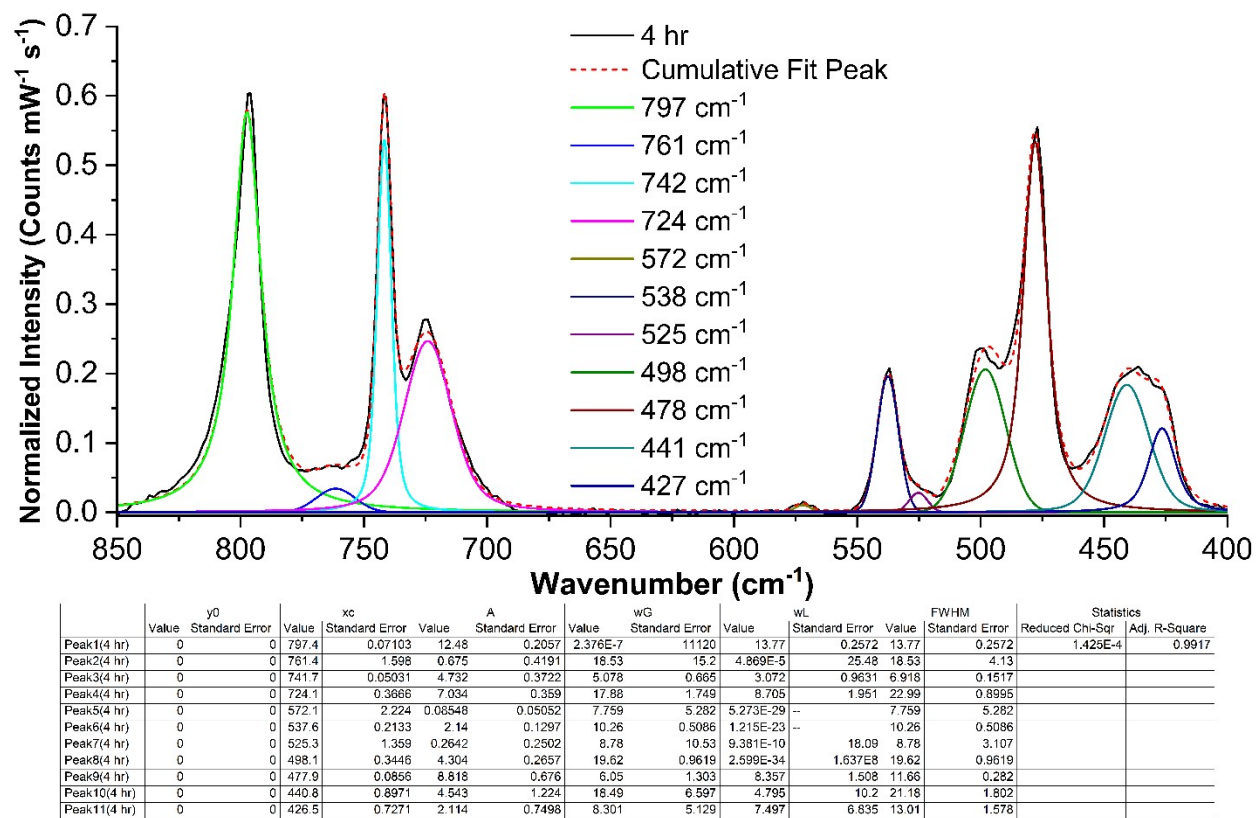

**Figure S24:** Solid-state Raman spectra with fitting parameters and statistics of  $[(\text{Co}(\text{NH}_3)_6)(\text{NpO}_4(\text{OH})_2)] \cdot (\text{H}_2\text{O})_n$  ( $n = 2-4$ ) after 4 hours of exposure to acidic vapor.



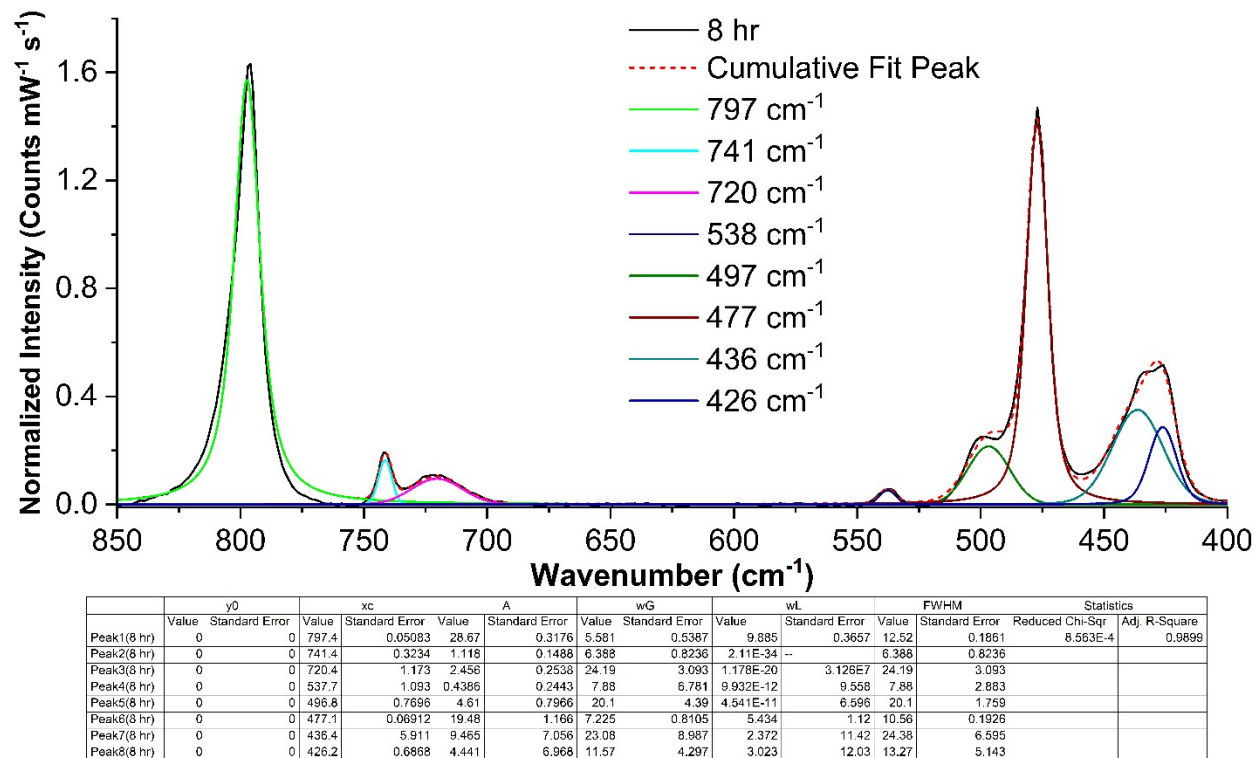

**Figure S25:** Solid-state Raman spectra with fitting parameters and statistics of  $[(\text{Co}(\text{NH}_3)_6)(\text{NpO}_4(\text{OH})_2)] \cdot (\text{H}_2\text{O})_n$  ( $n = 2-4$ ) after 8 hours of exposure to acidic vapor.

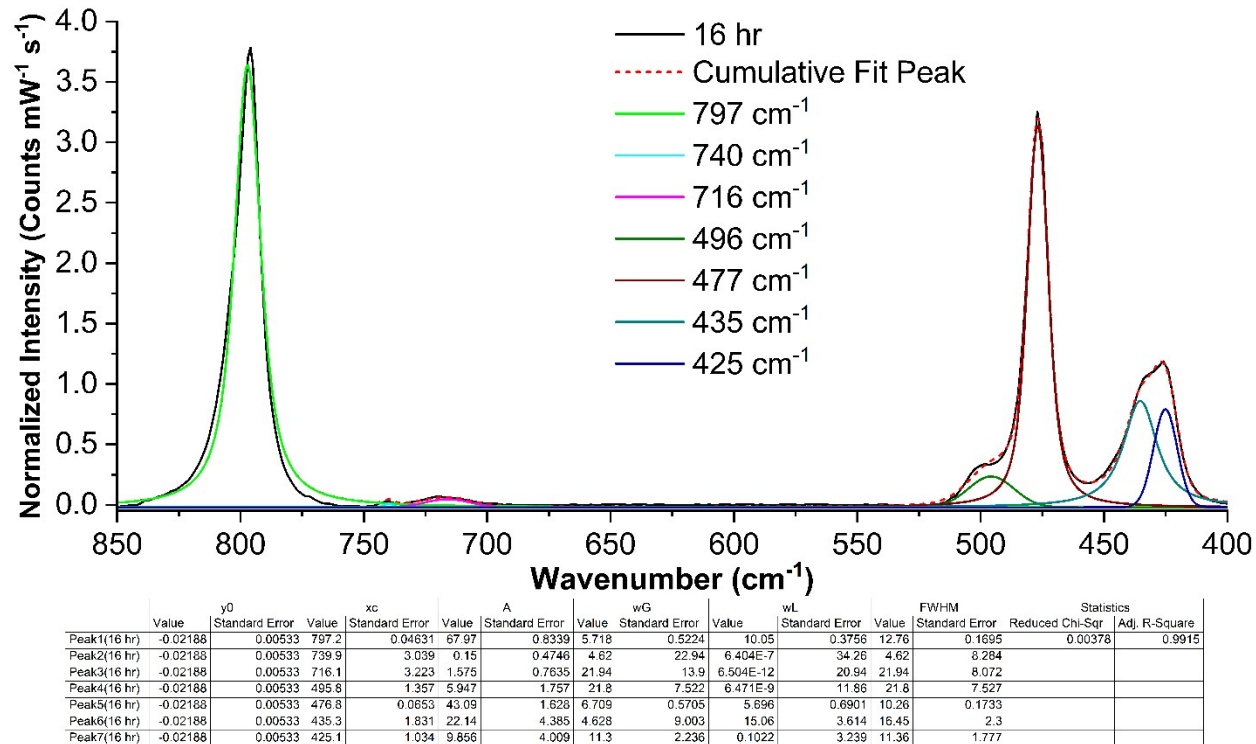

**Figure S26:** Solid-state Raman spectra with fitting parameters and statistics of  $[(\text{Co}(\text{NH}_3)_6)(\text{NpO}_4(\text{OH})_2)] \cdot (\text{H}_2\text{O})_n$  ( $n = 2-4$ ) after 16 hours of exposure to acidic vapor.

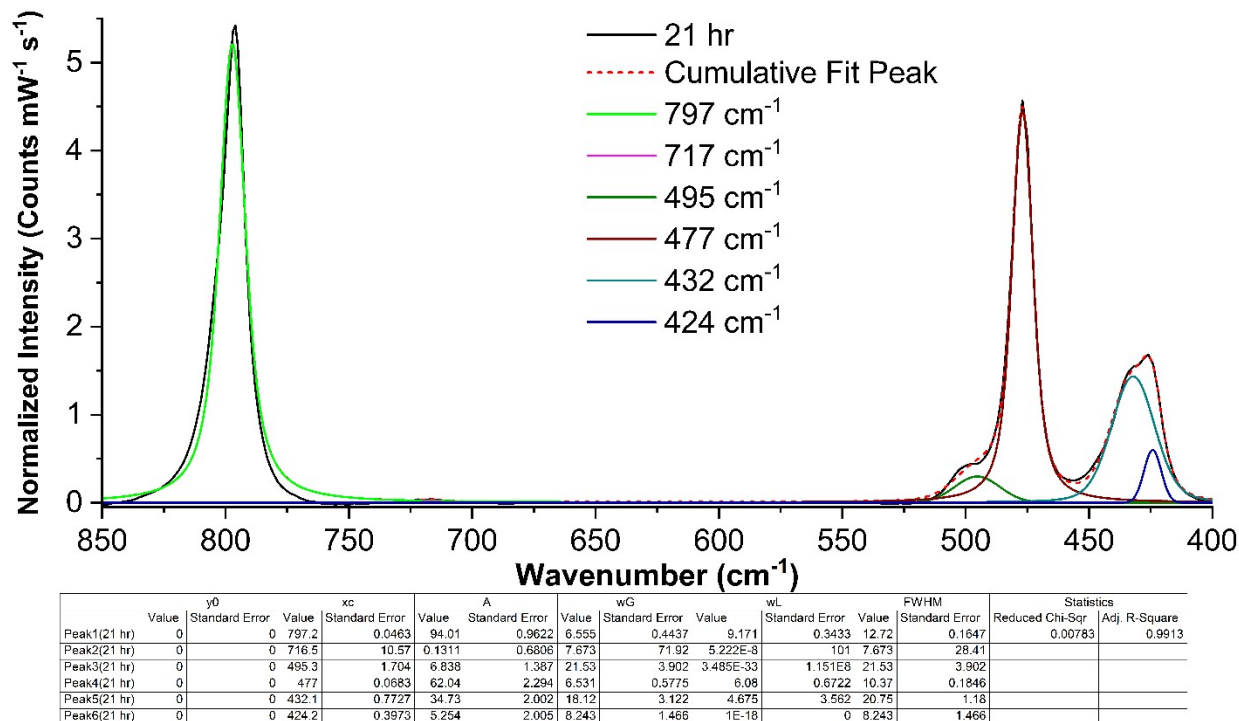

**Figure S27:** Solid-state Raman spectra with fitting parameters and statistics of  $[(\text{Co}(\text{NH}_3)_6)(\text{NpO}_4(\text{OH})_2)] \cdot (\text{H}_2\text{O})_n$  ( $n = 2-4$ ) after 21 hours of exposure to acidic vapor.

### 3. References

- (1) Rajapaksha, H.; Benthin, G. C.; Markun, E. L.; Mason, S. E.; Forbes, T. Z. Synthesis, characterization, and density functional theory investigation of  $(\text{CH}_6\text{N}_3)_2[\text{NpO}_2\text{Cl}_3]$  and  $\text{Rb}[\text{NpO}_2\text{Cl}_2(\text{H}_2\text{O})]$  chain structures. *Dalton Transactions* **2024**, 10.1039/D3DT03630H. DOI: 10.1039/D3DT03630H.
- (2) Augustine, L. J.; Pyrch, M. M. F.; Kravchuk, D. V.; Williams, J. M.; Mason, S. E.; Forbes, T. Z. Density Functional Theory Guided Investigation of Ligand-Induced Neptunyl-Neptunyl Interactions. *European Journal of Inorganic Chemistry* **2023**, 26 (14). DOI: <https://doi.org/10.1002/ejic.202200693> (accessed 2023/05/27).
- (3) Kravchuk, D. V.; Augustine, L. J.; Rajapaksha, H.; Benthin, G. C.; Batista, E. R.; Yang, P.; Forbes, T. Z. Insights into the Mechanism of Neptunium Oxidation to the Heptavalent State. *Chemistry* **2024**, 30 (23), e202304049. DOI: 10.1002/chem.202304049 From NLM PubMed-not-MEDLINE.
- (4) Bjorklund, J. L.; Pyrch, M. M.; Basile, M. C.; Mason, S. E.; Forbes, T. Z. Actinyl-cation interactions: experimental and theoretical assessment of  $[\text{Np}(\text{VI})\text{O}_2\text{Cl}_4]^{2-}$  and  $[\text{U}(\text{VI})\text{O}_2\text{Cl}_4]^{2-}$  systems. *Dalton Transactions* **2019**, 48 (24), 8861-8871, 10.1039/C9DT01753D. DOI: 10.1039/C9DT01753D.
- (5) Pyrch, M. M.; Bjorklund, J. L.; Williams, J. M.; Parr Iv, D. L.; Mason, S. E.; Leddy, J.; Forbes, T. Z. Impacts of hydrogen bonding interactions with  $\text{Np}(\text{V}/\text{VI})\text{O}_2\text{Cl}_4$  complexes: vibrational spectroscopy, redox behavior, and computational analysis. *Dalton Transactions* **2020**, 49 (20), 6854-6866, 10.1039/D0DT00848F. DOI: 10.1039/D0DT00848F.

- (6) Kovács, A.; Konings, R. J. M.; Gibson, J. K.; Infante, I.; Gagliardi, L. Quantum Chemical Calculations and Experimental Investigations of Molecular Actinide Oxides. *Chemical Reviews* **2015**, *115* (4), 1725-1759. DOI: 10.1021/cr500426s.
- (7) de Jong, W. A.; Aprà, E.; Windus, T. L.; Nichols, J. A.; Harrison, R. J.; Gutowski, K. E.; Dixon, D. A. Complexation of the Carbonate, Nitrate, and Acetate Anions with the Uranyl Dication: Density Functional Studies with Relativistic Effective Core Potentials. *The Journal of Physical Chemistry A* **2005**, *109* (50), 11568-11577. DOI: 10.1021/jp0541462.
- (8) Li, X.-B.; Wu, Q.-Y.; Wang, C.-Z.; Lan, J.-H.; Ning, S.-Y.; Wei, Y.-Z.; Chai, Z.-F.; Shi, W.-Q. Theoretical Study on the Reduction Mechanism of Np(VI) by Hydrazine Derivatives. *The Journal of Physical Chemistry A* **2020**, *124* (19), 3720-3729. DOI: 10.1021/acs.jpca.0c01504.
- (9) Hickam, S.; Ray, D.; Szymanowski, J. E. S.; Li, R.-Y.; Dembowski, M.; Smith, P.; Gagliardi, L.; Burns, P. C. Neptunyl Peroxide Chemistry: Synthesis and Spectroscopic Characterization of a Neptunyl Triperoxide Compound,  $\text{Ca}_2[\text{NpO}_2(\text{O}_2)_3] \cdot 9\text{H}_2\text{O}$ . *Inorganic Chemistry* **2019**, *58* (18), 12264-12271. DOI: 10.1021/acs.inorgchem.9b01712.
- (10) Yin, Y.-P.; Dong, C.-Z.; Ding, X.-B. Structural and spectral characteristics of neptunyl nitrates  $\text{NpO}_2(\text{NO}_3)_n^q$  ( $n=1-3$ ,  $q=+1, 0, -1$ ) and the hydrated complexes  $\text{NpO}_2(\text{NO}_3)_2(\text{H}_2\text{O})_m$  ( $m=1-4$ ). *Chemical Physics Letters* **2015**, *635*, 134-138. DOI: <https://doi.org/10.1016/j.cplett.2015.06.048>.
- (11) Tecmer, P.; Gomes, A. S. P.; Ekström, U.; Visscher, L. Electronic spectroscopy of  $\text{UO}_2^{2+}$ ,  $\text{NUO}^+$  and  $\text{NUN}$ : an evaluation of time-dependent density functional theory for actinides. *Physical Chemistry Chemical Physics* **2011**, *13* (13), 6249-6259, 10.1039/C0CP02534H. DOI: 10.1039/C0CP02534H.
- (12) Su, J.; Batista, E. R.; Boland, K. S.; Bone, S. E.; Bradley, J. A.; Cary, S. K.; Clark, D. L.; Conradson, S. D.; Ditter, A. S.; Kaltsoyannis, N.; et al. Energy-Degeneracy-Driven Covalency in Actinide Bonding. *Journal of the American Chemical Society* **2018**, *140* (51), 17977-17984. DOI: 10.1021/jacs.8b09436.
- (13) Gendron, F.; Páez-Hernández, D.; Notter, F.-P.; Pritchard, B.; Bolvin, H.; Autschbach, J. Magnetic Properties and Electronic Structure of Neptunyl(VI) Complexes: Wavefunctions, Orbitals, and Crystal-Field Models. *Chemistry – A European Journal* **2014**, *20* (26), 7994-8011. DOI: <https://doi.org/10.1002/chem.201305039>.
- (14) Heaven, M. C.; Barker, B. J.; Antonov, I. O. Spectroscopy and Structure of the Simplest Actinide Bonds. *The Journal of Physical Chemistry A* **2014**, *118* (46), 10867-10881. DOI: 10.1021/jp507283n.
- (15) Hu, H.-S.; Wei, F.; Wang, X.; Andrews, L.; Li, J. Actinide–Silicon Multiradical Bonding: Infrared Spectra and Electronic Structures of the  $\text{Si}(\mu\text{-X})\text{AnF}_3$  ( $\text{An} = \text{Th}, \text{U}$ ;  $\text{X} = \text{H}, \text{F}$ ) Molecules. *Journal of the American Chemical Society* **2014**, *136* (4), 1427-1437. DOI: 10.1021/ja409527u.
